# Supplementary material
Source: Research Square preprint supplement (doi:10.21203/rs.3.rs-9151773/v1)
Supplement: Supplementary file 1 [file 73c518d9bf6e42e031e2b7c0.xlsx]

## Sheet: LAS outputs - RIB
	Maxsurf LAS stability outputs and post-processing for a RIB
	Righting arm GZ [m]
	Test ID	Angle of heel (φ)
		0°	5°	10°	15°	20°	25°	30°	35°	40°	45°	50°	55°	60°	65°	70°	75°	80°	85°	90°	95°	100°	105°	110°	115°	120°	125°	130°	135°	140°	145°	150°	155°	160°	165°	170°	175°	180°
	Lightship	0	0.072	0.144	0.21	0.277	0.381	0.499	0.599	0.659	0.685	0.689	0.669	0.629	0.576	0.513	0.442	0.364	0.282	0.196	0.108	0.018	-0.073	-0.163	-0.251	-0.337	-0.419	-0.496	-0.569	-0.636	-0.696	-0.748	-0.789	-0.815	-0.821	-0.76	-0.528	0
	D-0,5	0	0.072	0.144	0.209	0.275	0.38	0.496	0.596	0.655	0.681	0.684	0.664	0.624	0.57	0.507	0.436	0.358	0.276	0.19	0.102	0.012	-0.079	-0.169	-0.257	-0.342	-0.423	-0.5	-0.573	-0.639	-0.699	-0.75	-0.79	-0.815	-0.82	-0.76	-0.527	0
	D-1	0	0.072	0.144	0.208	0.274	0.378	0.494	0.593	0.651	0.677	0.68	0.659	0.619	0.565	0.501	0.43	0.352	0.27	0.184	0.096	0.006	-0.084	-0.174	-0.262	-0.347	-0.428	-0.504	-0.576	-0.643	-0.702	-0.752	-0.791	-0.816	-0.82	-0.76	-0.526	0
	D-5	0	0.072	0.142	0.202	0.266	0.366	0.477	0.57	0.623	0.644	0.644	0.62	0.577	0.522	0.457	0.385	0.307	0.224	0.139	0.051	-0.039	-0.128	-0.216	-0.302	-0.385	-0.463	-0.536	-0.604	-0.667	-0.721	-0.767	-0.802	-0.821	-0.819	-0.756	-0.517	0
	D-10	0	0.072	0.139	0.195	0.256	0.354	0.458	0.543	0.589	0.606	0.601	0.574	0.529	0.473	0.407	0.333	0.255	0.172	0.086	-0.001	-0.089	-0.177	-0.263	-0.347	-0.427	-0.503	-0.572	-0.636	-0.693	-0.743	-0.784	-0.812	-0.825	-0.816	-0.749	-0.505	0
	D-50	0	0.07	0.115	0.151	0.218	0.287	0.342	0.366	0.368	0.359	0.334	0.293	0.237	0.172	0.1	0.024	-0.055	-0.135	-0.215	-0.295	-0.373	-0.448	-0.52	-0.587	-0.649	-0.705	-0.754	-0.795	-0.825	-0.845	-0.852	-0.844	-0.817	-0.762	-0.652	-0.409	0
	D-100	0	0.043	0.086	0.139	0.189	0.222	0.223	0.211	0.183	0.144	0.096	0.041	-0.02	-0.087	-0.158	-0.23	-0.303	-0.375	-0.446	-0.513	-0.577	-0.636	-0.691	-0.74	-0.782	-0.818	-0.846	-0.865	-0.875	-0.873	-0.857	-0.823	-0.765	-0.672	-0.529	-0.307	0
	D-300	0	0.007	-0.008	-0.045	-0.097	-0.159	-0.226	-0.296	-0.366	-0.434	-0.499	-0.56	-0.616	-0.668	-0.716	-0.759	-0.798	-0.831	-0.86	-0.883	-0.9	-0.911	-0.916	-0.914	-0.904	-0.887	-0.861	-0.827	-0.783	-0.729	-0.665	-0.588	-0.498	-0.393	-0.272	-0.139	0
	D-500	0	0	0	0	0	0	0	0	0	0	0	0	0	0	0	0	0	0	0	0	0	0	0	0	0	0	0	0	0	0	0	0	0	0	0	0	0
	D-1000	0	0	0	0	0	0	0	0	0	0	0	0	0	0	0	0	0	0	0	0	0	0	0	0	0	0	0	0	0	0	0	0	0	0	0	0	0
	W-0,5	0	0.072	0.144	0.208	0.275	0.379	0.495	0.595	0.653	0.679	0.682	0.662	0.622	0.568	0.504	0.433	0.356	0.273	0.187	0.099	0.009	-0.081	-0.171	-0.259	-0.344	-0.425	-0.502	-0.574	-0.641	-0.7	-0.751	-0.791	-0.816	-0.82	-0.76	-0.526	0
	W-1	0	0.072	0.144	0.207	0.273	0.377	0.492	0.59	0.648	0.673	0.676	0.655	0.614	0.56	0.496	0.425	0.347	0.265	0.179	0.09	0.001	-0.089	-0.179	-0.267	-0.351	-0.432	-0.508	-0.58	-0.645	-0.704	-0.754	-0.793	-0.817	-0.82	-0.759	-0.525	0
	W-5	0	0.072	0.14	0.199	0.261	0.36	0.468	0.558	0.607	0.627	0.624	0.598	0.555	0.499	0.434	0.361	0.283	0.2	0.114	0.026	-0.062	-0.151	-0.238	-0.323	-0.405	-0.481	-0.553	-0.619	-0.679	-0.732	-0.775	-0.807	-0.823	-0.818	-0.753	-0.512	0
	W-10	0	0.073	0.137	0.188	0.249	0.344	0.441	0.52	0.56	0.573	0.564	0.535	0.489	0.431	0.364	0.29	0.211	0.128	0.043	-0.044	-0.131	-0.217	-0.302	-0.384	-0.462	-0.535	-0.601	-0.661	-0.715	-0.76	-0.796	-0.82	-0.828	-0.812	-0.741	-0.495	0
	W-50	0	0.06	0.101	0.146	0.207	0.261	0.291	0.29	0.28	0.256	0.221	0.174	0.116	0.049	-0.022	-0.097	-0.174	-0.251	-0.327	-0.401	-0.473	-0.541	-0.605	-0.663	-0.716	-0.763	-0.802	-0.833	-0.854	-0.863	-0.859	-0.837	-0.795	-0.72	-0.592	-0.359	0
	W-100	0	0.027	0.075	0.128	0.156	0.157	0.139	0.104	0.058	0.005	-0.055	-0.118	-0.184	-0.251	-0.319	-0.386	-0.452	-0.515	-0.575	-0.631	-0.682	-0.729	-0.769	-0.804	-0.832	-0.853	-0.866	-0.87	-0.865	-0.848	-0.817	-0.769	-0.696	-0.589	-0.438	-0.239	0
	W-300	0	0	0	0	0	0	0	0	0	0	0	0	0	0	0	0	0	0	0	0	0	0	0	0	0	0	0	0	0	0	0	0	0	0	0	0	0
	W-500	0	0	0	0	0	0	0	0	0	0	0	0	0	0	0	0	0	0	0	0	0	0	0	0	0	0	0	0	0	0	0	0	0	0	0	0	0
	W-1000	0	0	0	0	0	0	0	0	0	0	0	0	0	0	0	0	0	0	0	0	0	0	0	0	0	0	0	0	0	0	0	0	0	0	0	0	0
	Cumulative area under the righting arm GZ [m.deg]
	Test ID	Angle of heel (φ)
		0°	5°	10°	15°	20°	25°	30°	35°	40°	45°	50°	55°	60°	65°	70°	75°	80°	85°	90°	95°	100°	105°	110°	115°	120°	125°	130°	135°	140°	145°	150°	155°	160°	165°	170°	175°	180°
	Lightship	0	0.1795	0.72	1.6074	2.8135	4.4442	6.6447	9.4016	12.5626	15.9343	19.3802	22.7858	26.0397	29.058	31.7831	34.1713	36.1879	37.805	39.0013	39.7612	40.0746	39.9362	39.346	38.3091	36.8364	34.9458	32.6582	29.9944	26.9794	23.6449	20.0298	16.183	12.1693	8.0664	4.0725	0.7384	-0.6658
	D-0,5	0	0.1795	0.7193	1.6039	2.8051	4.4291	6.6202	9.3641	12.5085	15.8603	19.2838	22.6649	25.8923	28.8829	31.5795	33.9386	35.9256	37.5128	38.6789	39.4088	39.6926	39.5252	38.9067	37.8427	36.3443	34.4295	32.1196	29.436	26.4035	23.0542	19.4272	15.5715	11.5523	7.4478	3.4548	0.1245	-1.2761
	D-1	0	0.1793	0.7199	1.6032	2.7993	4.4167	6.5985	9.3295	12.4574	15.7895	19.1907	22.5474	25.7487	28.7118	31.3802	33.7105	35.6681	37.2256	38.3619	39.0621	39.3166	39.1204	38.4742	37.3834	35.8595	33.9207	31.5889	28.8855	25.8358	22.4719	18.8332	14.9689	10.9441	6.8383	2.8463	-0.4801	-1.8774
	D-5	0	0.1798	0.7164	1.5788	2.7375	4.3055	6.4165	9.0481	12.0473	15.2261	18.4555	21.6223	24.6205	27.3732	29.8254	31.9344	33.6668	34.9966	35.9048	36.3781	36.4085	35.9931	35.1341	33.8391	32.1212	30.0001	27.5007	24.6477	21.468	17.9947	14.2685	10.3402	6.2764	2.163	-1.8164	-5.1086	-6.4788
	D-10	0	0.1813	0.7134	1.5509	2.6674	4.1819	6.2137	8.7292	11.5761	14.574	17.5999	20.5441	23.3082	25.8185	28.021	29.8741	31.3463	32.414	33.0602	33.2739	33.049	32.3845	31.2848	29.7588	27.8212	25.4941	22.8057	19.7845	16.4594	12.8651	9.044	5.0483	0.9465	-3.1691	-7.1233	-10.3653	-11.7012
	D-50	0	0.1829	0.6566	1.3138	2.2256	3.4913	5.0738	6.8562	8.696	10.5176	12.2582	13.8324	15.1625	16.1886	16.8708	17.1824	17.1059	16.6313	15.7547	14.4778	12.8071	10.7538	8.3333	5.5651	2.4733	-0.9143	-4.5649	-8.4404	-12.4951	-16.6754	-20.9219	-25.1677	-29.3306	-33.2935	-36.864	-39.588	-40.6551
	D-100	0	0.1075	0.425	0.9837	1.809	2.849	3.9722	5.0625	6.0527	6.874	7.4764	7.8213	7.8767	7.612	7.0023	6.0334	4.7	3.0033	0.9502	-1.4474	-4.1737	-7.2088	-10.5293	-14.1086	-17.9168	-21.9208	-26.084	-30.3656	-34.72	-39.0941	-43.4241	-47.6306	-51.6109	-55.2184	-58.2456	-60.3751	-61.1658
	D-300	0	0.0232	0.0302	-0.0953	-0.4455	-1.0828	-2.0446	-3.3506	-5.0075	-7.0105	-9.3462	-11.9955	-14.9373	-18.15	-21.6122	-25.3014	-29.1949	-33.2691	-37.4992	-41.859	-46.3201	-50.8524	-55.4239	-60.0009	-64.5478	-69.0273	-73.3995	-77.6224	-81.529	-85.4372	-88.9272	-92.0634	-94.7832	-97.0153	-98.6833	-99.7167	-100.067
	D-500	0	0	0	0	0	0	0	0	0	0	0	0	0	0	0	0	0	0	0	0	0	0	0	0	0	0	0	0	0	0	0	0	0	0	0	0	0
	D-1000	0	0	0	0	0	0	0	0	0	0	0	0	0	0	0	0	0	0	0	0	0	0	0	0	0	0	0	0	0	0	0	0	0	0	0	0	0
	W-0,5	0	0.1792	0.7202	1.605	2.8038	4.4247	6.6116	9.3496	12.4865	15.8293	19.2427	22.6126	25.8282	28.8062	31.49	33.8359	35.8095	37.3831	38.5357	39.252	39.5224	39.3419	38.7108	37.6345	36.1245	34.1987	31.8789	29.1862	26.1459	22.7899	19.1576	15.2979	11.2761	7.1711	3.1785	-0.15	-1.5492
	W-1	0	0.1793	0.7195	1.6003	2.792	4.4034	6.5768	9.2963	12.4092	15.7234	19.1047	22.4393	25.6169	28.5553	31.1983	33.5026	35.4338	36.9645	38.074	38.7475	38.9755	38.7536	38.0822	36.9673	35.4205	33.4602	31.1086	28.3875	25.3224	21.9455	18.2963	14.4241	10.3945	6.2876	2.2966	-1.0262	-2.4205
	W-5	0	0.1804	0.7149	1.5659	2.7047	4.2474	6.3211	8.8989	11.8277	14.9229	18.0586	21.1227	24.012	26.6519	28.988	30.9782	32.5895	33.7972	34.5835	34.9357	34.8469	34.3151	33.3435	31.9403	30.1194	27.9018	25.314	22.3822	19.1342	15.6038	11.8326	7.872	3.7896	-0.3259	-4.295	-7.5653	-8.9199
	W-10	0	0.1848	0.7145	1.5296	2.6117	4.0847	6.0521	8.469	11.1847	14.027	16.8788	19.6349	22.2025	24.5089	26.5008	28.1385	29.3922	30.2405	30.6681	30.6656	30.229	29.3589	28.0611	26.3461	24.2297	21.7342	18.8906	15.7317	12.2886	8.5974	4.7016	0.655	-3.4726	-7.584	-11.508	-14.6991	-16.0036
	W-50	0	0.1573	0.5643	1.1732	2.0539	3.2309	4.6223	6.0841	7.5142	8.8609	10.057	11.0492	11.7791	12.1952	12.2645	11.966	11.288	10.2261	8.7815	6.9607	4.775	2.2398	-0.6255	-3.7977	-7.2498	-10.9512	-14.8671	-18.9582	-23.1793	-27.4766	-31.7867	-36.0345	-40.1253	-43.9264	-47.2368	-49.6688	-50.5986
	W-100	0	0.0626	0.3123	0.8254	1.5464	2.3393	3.0873	3.7006	4.1115	4.2722	4.1493	3.7197	2.9671	1.8811	0.4563	-1.3068	-3.4026	-5.8207	-8.5468	-11.5631	-14.8483	-18.3782	-22.1261	-26.0627	-30.156	-34.3713	-38.6711	-43.0142	-47.355	-51.6415	-55.8115	-59.7852	-63.4577	-66.687	-69.2763	-70.9911	-71.5996
	W-300	0	0	0	0	0	0	0	0	0	0	0	0	0	0	0	0	0	0	0	0	0	0	0	0	0	0	0	0	0	0	0	0	0	0	0	0	0
	W-500	0	0	0	0	0	0	0	0	0	0	0	0	0	0	0	0	0	0	0	0	0	0	0	0	0	0	0	0	0	0	0	0	0	0	0	0	0
	W-1000	0	0	0	0	0	0	0	0	0	0	0	0	0	0	0	0	0	0	0	0	0	0	0	0	0	0	0	0	0	0	0	0	0	0	0	0	0
	Heeling arm HA [m]
		Angle of heel (φ)
		0°	5°	10°	15°	20°	25°	30°	35°	40°	45°	50°	55°	60°	65°	70°	75°	80°	85°	90°	95°	100°	105°	110°	115°	120°	125°	130°	135°	140°	145°	150°	155°	160°	165°	170°	175°	180°
	Beaufort 3	0.0996552	0.122719	0.148661	0.176859	0.204976	0.233354	0.260548	0.284413	0.30366	0.31815	0.326443	0.329263	0.325345	0.315644	0.303569	0.287375	0.261779	0.230532	0.198712	0.172441	0.142	0.106133	0.0705312	0.0375559	0.00807308	0.0185848	0.0423004	0.0621012	0.0719489	0.0776859	0.0802107	0.0806601	0.0781696	0.0694883	0.0619033	0.056985	0.0546399
	Beaufort 5	0.246087	0.30304	0.367101	0.436733	0.506165	0.57624	0.643395	0.702325	0.749854	0.785636	0.806115	0.813078	0.803403	0.779448	0.74963	0.70964	0.646433	0.569273	0.490698	0.425822	0.350653	0.262084	0.174169	0.0927401	0.0199356	0.0458931	0.104456	0.153352	0.17767	0.191836	0.198071	0.199181	0.193031	0.171594	0.152863	0.140718	0.134927
	Beaufort 7	0.49918	0.614707	0.744652	0.885899	1.02674	1.16888	1.3051	1.42464	1.52105	1.59364	1.63518	1.6493	1.62968	1.58108	1.5206	1.43948	1.31127	1.15475	0.995364	0.863767	0.711289	0.531628	0.353296	0.18812	0.0404386	0.0930925	0.211885	0.311069	0.360397	0.389134	0.401781	0.404032	0.391557	0.348072	0.310078	0.285442	0.273695
	Cumulative area under the heeling arm HA [m.deg]
	Test ID	Angle of heel (φ)
		0°	5°	10°	15°	20°	25°	30°	35°	40°	45°	50°	55°	60°	65°	70°	75°	80°	85°	90°	95°	100°	105°	110°	115°	120°	125°	130°	135°	140°	145°	150°	155°	160°	165°	170°	175°	180°
	Beaufort 3	0	0.331812	0.731806	1.20847	1.76497	2.39589	3.09719	3.86222	4.68207	5.54541	6.43975	7.35188	8.26798	9.17514	10.0604	10.9107	11.7139	12.4588	13.1432	13.7701	14.3416	14.8676	15.3601	15.8249	16.264	16.6763	17.0589	17.4076	17.7192	17.9942	18.2345	18.4394	18.6067	18.7368	18.8311	18.893	18.9315
	Beaufort 5	0	0.812562	1.79209	2.95938	4.32216	5.86721	7.58459	9.45805	11.4657	13.5799	15.7701	18.0037	20.2471	22.4686	24.6365	26.7188	28.6856	30.5099	32.1859	33.7211	35.1207	36.4086	37.6148	38.753	39.8282	40.838	41.7748	42.6287	43.392	44.0652	44.6537	45.1554	45.5652	45.8837	46.1146	46.2664	46.3606
	Beaufort 7	0	1.66409	3.67012	6.06067	8.85158	12.0158	15.5329	19.3696	23.4813	27.8111	32.2963	36.8708	41.4652	46.0147	50.4543	54.7189	58.7468	62.4829	65.9152	69.0592	71.9256	74.5631	77.0333	79.3643	81.5662	83.6342	85.5529	87.3016	88.8647	90.2435	91.4487	92.4762	93.3155	93.9677	94.4406	94.7515	94.9444
	Discrete area under GZ and HA differences for critical heel and DSI computation
	Beaufort 3	Angle of heel (φ)																																					Critical angle of heel φc	Cumulative GZ area up to φc	Cumulative HA area up to φc	DSI
		0°	5°	10°	15°	20°	25°	30°	35°	40°	45°	50°	55°	60°	65°	70°	75°	80°	85°	90°	95°	100°	105°	110°	115°	120°	125°	130°	135°	140°	145°	150°	155°	160°	165°	170°	175°	180°
	Lightship	0	-0.152312	0.140506	0.410734	0.649605	0.999773	1.49921	1.99186	2.34116	2.50835	2.55156	2.49347	2.3378	2.11114	1.83985	1.53787	1.21345	0.87214	0.511909	0.133012	-0.258148	-0.664319	-1.08274	-1.5017	-1.91175	-2.30294	-2.67018	-3.01249	-3.32666	-3.60942	-3.85541	-4.05168	-4.18105	-4.23296	-4.08819	-3.39609	-1.44267	96.7002	39.8678	13.9645	2.85495
	D-0,5	0	-0.152312	0.139806	0.407934	0.644705	0.993073	1.48981	1.97886	2.32456	2.48845	2.52916	2.46897	2.3113	2.08344	1.81135	1.50877	1.18385	0.84224	0.481709	0.103012	-0.287748	-0.693319	-1.11104	-1.5288	-1.93745	-2.32714	-2.69248	-3.03229	-3.34416	-3.62422	-3.86731	-4.06058	-4.18655	-4.23456	-4.08729	-3.39229	-1.43907	96.3181	39.4836	13.9208	2.83631
	D-1	0	-0.152512	0.140606	0.406634	0.639605	0.986473	1.48051	1.96596	2.30806	2.46875	2.50686	2.44457	2.2852	2.05594	1.78315	1.47997	1.15445	0.81254	0.451909	0.0733118	-0.317048	-0.722119	-1.13874	-1.5556	-1.96295	-2.35114	-2.71438	-3.05209	-3.36136	-3.63882	-3.87901	-4.06918	-4.19215	-4.23586	-4.08629	-3.38839	-1.43577	95.939	39.1099	13.8774	2.81824
	D-5	0	-0.152012	0.136606	0.385734	0.602205	0.937073	1.40971	1.86656	2.17936	2.31545	2.33506	2.25467	2.0821	1.84554	1.56695	1.25867	0.929252	0.58484	0.223809	-0.153588	-0.541148	-0.941319	-1.35154	-1.7598	-2.15695	-2.53344	-2.88198	-3.20169	-3.49136	-3.74822	-3.96651	-4.13318	-4.23115	-4.24346	-4.07369	-3.35419	-1.40867	92.9652	36.1855	13.515	2.67744
	D-10	0	-0.150512	0.132106	0.360834	0.560005	0.883573	1.33051	1.75046	2.02706	2.13455	2.13156	2.03207	1.848	1.60314	1.31725	1.00277	0.669052	0.32274	-0.0381911	-0.413188	-0.796448	-1.19042	-1.59224	-1.9908	-2.37665	-2.73944	-3.07098	-3.36989	-3.63676	-3.86922	-4.06141	-4.20058	-4.26915	-4.24566	-4.04849	-3.30399	-1.37437	89.4709	32.9918	13.0708	2.52409
	D-50	0	-0.148912	0.0737059	0.180534	0.355305	0.634773	0.881206	1.01736	1.01996	0.958255	0.846259	0.662072	0.414002	0.118943	-0.203047	-0.538731	-0.879648	-1.21956	-1.56099	-1.90379	-2.24225	-2.57922	-2.91304	-3.233	-3.53085	-3.79994	-4.03318	-4.22419	-4.36636	-4.45522	-4.48681	-4.45068	-4.33025	-4.09296	-3.66479	-2.78599	-1.10557	66.847	16.4406	9.50215	1.7302
	D-100	0	-0.224312	-0.0824941	0.082034	0.268805	0.409073	0.421906	0.325265	0.170357	-0.0420453	-0.291941	-0.567228	-0.860698	-1.17186	-1.49495	-1.81923	-2.13655	-2.44166	-2.73749	-3.02449	-3.29785	-3.56102	-3.81304	-4.0441	-4.24725	-4.41634	-4.54578	-4.63029	-4.66606	-4.64902	-4.57031	-4.41138	-4.14765	-3.73756	-3.12149	-2.19149	-0.829169	44.0102	6.71142	5.37451	1.24875
	D-300	0	-0.308612	-0.392994	-0.602166	-0.906695	-1.26823	-1.66309	-2.07104	-2.47674	-2.86635	-3.23004	-3.56143	-3.8579	-4.11986	-4.34745	-4.53953	-4.69665	-4.81916	-4.91449	-4.98669	-5.03265	-5.05822	-5.06404	-5.0418	-4.98595	-4.89184	-4.75478	-4.57159	-4.21826	-4.18312	-3.73031	-3.34108	-2.88715	-2.36216	-1.76229	-1.09539	-0.388469
	D-500	0	-0.331812	-0.399994	-0.476666	-0.556495	-0.630927	-0.701294	-0.765035	-0.819843	-0.863345	-0.894341	-0.912128	-0.916098	-0.907157	-0.885247	-0.850331	-0.803148	-0.74496	-0.684391	-0.626888	-0.571548	-0.525919	-0.492541	-0.464802	-0.439047	-0.412343	-0.382578	-0.348694	-0.311664	-0.274923	-0.240314	-0.204885	-0.167348	-0.130056	-0.0942907	-0.0619851	-0.0384691
	D-1000	0	-0.331812	-0.399994	-0.476666	-0.556495	-0.630927	-0.701294	-0.765035	-0.819843	-0.863345	-0.894341	-0.912128	-0.916098	-0.907157	-0.885247	-0.850331	-0.803148	-0.74496	-0.684391	-0.626888	-0.571548	-0.525919	-0.492541	-0.464802	-0.439047	-0.412343	-0.382578	-0.348694	-0.311664	-0.274923	-0.240314	-0.204885	-0.167348	-0.130056	-0.0942907	-0.0619851	-0.0384691
	W-0,5	0	-0.152612	0.141006	0.408134	0.642305	0.989973	1.48561	1.97296	2.31706	2.47945	2.51906	2.45777	2.2995	2.07084	1.79855	1.49557	1.17045	0.82864	0.468209	0.0894118	-0.301148	-0.706419	-1.12364	-1.5411	-1.94905	-2.33814	-2.70238	-3.04139	-3.35196	-3.63092	-3.87261	-4.06458	-4.18915	-4.23506	-4.08689	-3.39049	-1.43767	96.1447	39.3139	13.9009	2.82815
	W-1	0	-0.152512	0.140206	0.404134	0.635205	0.980473	1.47211	1.95446	2.29306	2.45085	2.48696	2.42247	2.2615	2.03124	1.75775	1.45397	1.12805	0.78574	0.425109	0.0466118	-0.343548	-0.747819	-1.16394	-1.5797	-1.98585	-2.37264	-2.73418	-3.06979	-3.37676	-3.65182	-3.88951	-4.07708	-4.19695	-4.23696	-4.08529	-3.38479	-1.43277	95.5973	38.7747	13.8384	2.80197
	W-5	0	-0.151412	0.134506	0.374334	0.582305	0.911773	1.37241	1.81276	2.10896	2.23185	2.24136	2.15197	1.9732	1.73274	1.45085	1.13987	0.808152	0.46274	0.101909	-0.274688	-0.660348	-1.05772	-1.46414	-1.868	-2.25995	-2.62994	-2.97038	-3.28049	-3.55966	-3.80532	-4.01151	-4.16548	-4.24975	-4.24556	-4.06339	-3.33229	-1.39307	91.353	34.6788	13.3129	2.60491
	W-10	0	-0.147012	0.129706	0.338434	0.525605	0.842073	1.26611	1.65186	1.89586	1.97895	1.95746	1.84397	1.6515	1.39924	1.10665	0.787369	0.450552	0.10334	-0.256791	-0.629388	-1.00815	-1.39602	-1.79034	-2.1798	-2.55545	-2.90784	-3.22618	-3.50759	-3.75476	-3.96612	-4.13611	-4.25148	-4.29495	-4.24146	-4.01829	-3.25309	-1.34297	86.4348	30.3632	12.6552	2.39927
	W-50	0	-0.174512	0.00700587	0.132234	0.324205	0.546073	0.690106	0.696765	0.610257	0.483355	0.301759	0.080072	-0.186198	-0.491057	-0.815947	-1.14883	-1.48115	-1.80686	-2.12899	-2.44769	-2.75725	-3.06112	-3.35784	-3.637	-3.89115	-4.11374	-4.29848	-4.43979	-4.53276	-4.57222	-4.55041	-4.45268	-4.25815	-3.93116	-3.40469	-2.49399	-0.968269	56.5036	11.2687	7.62737	1.4774
	W-100	0	-0.269212	-0.150294	0.036434	0.164505	0.161973	0.0467063	-0.151735	-0.408943	-0.702645	-1.01724	-1.34173	-1.6687	-1.99316	-2.31005	-2.61343	-2.89895	-3.16306	-3.41049	-3.64319	-3.85675	-4.05582	-4.24044	-4.4014	-4.53235	-4.62764	-4.68238	-4.69179	-4.65246	-4.56142	-4.41031	-4.17858	-3.83985	-3.35936	-2.68359	-1.77679	-0.646969	31.1768	3.23165	3.27725	0.986085
	W-300	0	-0.331812	-0.399994	-0.476666	-0.556495	-0.630927	-0.701294	-0.765035	-0.819843	-0.863345	-0.894341	-0.912128	-0.916098	-0.907157	-0.885247	-0.850331	-0.803148	-0.74496	-0.684391	-0.626888	-0.571548	-0.525919	-0.492541	-0.464802	-0.439047	-0.412343	-0.382578	-0.348694	-0.311664	-0.274923	-0.240314	-0.204885	-0.167348	-0.130056	-0.0942907	-0.0619851	-0.0384691
	W-500	0	-0.331812	-0.399994	-0.476666	-0.556495	-0.630927	-0.701294	-0.765035	-0.819843	-0.863345	-0.894341	-0.912128	-0.916098	-0.907157	-0.885247	-0.850331	-0.803148	-0.74496	-0.684391	-0.626888	-0.571548	-0.525919	-0.492541	-0.464802	-0.439047	-0.412343	-0.382578	-0.348694	-0.311664	-0.274923	-0.240314	-0.204885	-0.167348	-0.130056	-0.0942907	-0.0619851	-0.0384691
	W-1000	0	-0.331812	-0.399994	-0.476666	-0.556495	-0.630927	-0.701294	-0.765035	-0.819843	-0.863345	-0.894341	-0.912128	-0.916098	-0.907157	-0.885247	-0.850331	-0.803148	-0.74496	-0.684391	-0.626888	-0.571548	-0.525919	-0.492541	-0.464802	-0.439047	-0.412343	-0.382578	-0.348694	-0.311664	-0.274923	-0.240314	-0.204885	-0.167348	-0.130056	-0.0942907	-0.0619851	-0.0384691
	Beaufort 5	Angle of heel (φ)																																					Critical angle of heel φc	Cumulative GZ area up to φc	Cumulative HA area up to φc	DSI
		0°	5°	10°	15°	20°	25°	30°	35°	40°	45°	50°	55°	60°	65°	70°	75°	80°	85°	90°	95°	100°	105°	110°	115°	120°	125°	130°	135°	140°	145°	150°	155°	160°	165°	170°	175°	180°
	Lightship	0	-0.633062	-0.43903	-0.279889	-0.15668	0.0856467	0.483129	0.883435	1.15332	1.25749	1.25578	1.17192	1.0105	0.796799	0.557254	0.305856	0.0498014	-0.207205	-0.479679	-0.775263	-1.08624	-1.4263	-1.79637	-2.17514	-2.54787	-2.90037	-3.22448	-3.5177	-3.77822	-4.00775	-4.20359	-4.34853	-4.42351	-4.42139	-4.2248	-3.48589	-1.49841	80.9689	36.5013	29.0391	1.25697
	D-0,5	0	-0.633062	-0.43973	-0.282689	-0.16158	0.0789467	0.473729	0.870435	1.13672	1.23759	1.23338	1.14742	0.984002	0.769099	0.528754	0.276756	0.0202014	-0.237105	-0.509879	-0.805263	-1.11584	-1.4553	-1.82467	-2.20224	-2.57357	-2.92457	-3.24678	-3.5375	-3.79572	-4.02255	-4.21549	-4.35743	-4.42901	-4.42299	-4.2239	-3.48209	-1.49481	80.3926	36.0502	28.8289	1.25049
	D-1	0	-0.633262	-0.43893	-0.283989	-0.16668	0.0723467	0.464429	0.857535	1.12022	1.21789	1.21108	1.12302	0.957902	0.741599	0.500554	0.247956	-0.00919857	-0.266805	-0.539679	-0.834963	-1.14514	-1.4841	-1.85237	-2.22904	-2.59907	-2.94857	-3.26868	-3.5573	-3.81292	-4.03715	-4.22719	-4.36603	-4.43461	-4.42429	-4.2229	-3.47819	-1.49151	79.8211	35.5981	28.6153	1.24402
	D-5	0	-0.632762	-0.44293	-0.304889	-0.20408	0.0229467	0.393629	0.758135	0.991518	1.06459	1.03928	0.933125	0.754802	0.531199	0.284354	0.0266563	-0.234399	-0.494505	-0.767779	-1.06186	-1.36924	-1.7033	-2.06517	-2.43324	-2.79307	-3.13087	-3.43628	-3.7069	-3.94292	-4.14655	-4.31469	-4.43003	-4.47361	-4.43189	-4.2103	-3.44399	-1.46441	75.5106	32.1113	26.9197	1.19286
	D-10	0	-0.631262	-0.44743	-0.329789	-0.24628	-0.0305533	0.314429	0.642035	0.839218	0.883687	0.835783	0.710525	0.520702	0.288799	0.0346535	-0.229244	-0.494599	-0.756605	-1.02978	-1.32146	-1.62454	-1.9524	-2.30587	-2.66424	-3.01277	-3.33687	-3.62528	-3.8751	-4.08832	-4.26755	-4.40959	-4.49743	-4.51161	-4.43409	-4.1851	-3.39379	-1.43011	70.6566	28.2643	24.9099	1.13466
	D-50	0	-0.629662	-0.50583	-0.510089	-0.45098	-0.279353	-0.134871	-0.0910655	-0.167882	-0.292613	-0.449517	-0.659475	-0.913298	-1.1954	-1.48565	-1.77074	-2.0433	-2.2989	-2.55258	-2.81206	-3.07034	-3.3412	-3.62667	-3.90644	-4.16697	-4.39737	-4.58748	-4.7294	-4.81792	-4.85355	-4.83499	-4.74753	-4.57271	-4.28139	-3.8014	-2.87579	-1.16131
	D-100	0	-0.705062	-0.66203	-0.608589	-0.53748	-0.505053	-0.594171	-0.783165	-1.01748	-1.29291	-1.58772	-1.88878	-2.188	-2.4862	-2.77755	-3.05124	-3.3002	-3.521	-3.72908	-3.93276	-4.12594	-4.323	-4.52667	-4.71754	-4.88337	-5.01377	-5.10008	-5.1355	-5.11762	-5.04735	-4.91849	-4.70823	-4.39011	-3.92599	-3.2581	-2.28129	-0.884906
	D-300	0	-0.789362	-0.97253	-1.29279	-1.71298	-2.18235	-2.67917	-3.17947	-3.66458	-4.11721	-4.52582	-4.88298	-5.1852	-5.4342	-5.63005	-5.77154	-5.8603	-5.8985	-5.90608	-5.89496	-5.86074	-5.8202	-5.77767	-5.71524	-5.62207	-5.48927	-5.30908	-5.0768	-4.66982	-4.58145	-4.07849	-3.63793	-3.12961	-2.55059	-1.8989	-1.18519	-0.444206
	D-500	0	-0.812562	-0.97953	-1.16729	-1.36278	-1.54505	-1.71737	-1.87347	-2.00768	-2.11421	-2.19012	-2.23368	-2.2434	-2.2215	-2.16785	-2.08234	-1.9668	-1.8243	-1.67598	-1.53516	-1.39964	-1.2879	-1.20617	-1.13824	-1.07517	-1.00977	-0.93688	-0.853903	-0.763222	-0.673248	-0.588495	-0.501734	-0.409812	-0.318488	-0.230905	-0.151793	-0.0942056
	D-1000	0	-0.812562	-0.97953	-1.16729	-1.36278	-1.54505	-1.71737	-1.87347	-2.00768	-2.11421	-2.19012	-2.23368	-2.2434	-2.2215	-2.16785	-2.08234	-1.9668	-1.8243	-1.67598	-1.53516	-1.39964	-1.2879	-1.20617	-1.13824	-1.07517	-1.00977	-0.93688	-0.853903	-0.763222	-0.673248	-0.588495	-0.501734	-0.409812	-0.318488	-0.230905	-0.151793	-0.0942056
	W-0,5	0	-0.633362	-0.43853	-0.282489	-0.16398	0.0758467	0.469529	0.864535	1.12922	1.22859	1.22328	1.13622	0.972202	0.756499	0.515954	0.263556	0.00680143	-0.250705	-0.523379	-0.818863	-1.12924	-1.4684	-1.83727	-2.21454	-2.58517	-2.93557	-3.25668	-3.5466	-3.80352	-4.02925	-4.22079	-4.36143	-4.43161	-4.42349	-4.2235	-3.48029	-1.49341	80.1321	35.8511	28.7338	1.2477
	W-1	0	-0.633262	-0.43933	-0.286489	-0.17108	0.0663467	0.456029	0.846035	1.10522	1.19999	1.19118	1.10092	0.934202	0.716899	0.475154	0.221956	-0.0355986	-0.293605	-0.566479	-0.861663	-1.17164	-1.5098	-1.87757	-2.25314	-2.62197	-2.97007	-3.28848	-3.575	-3.82832	-4.05015	-4.23769	-4.37393	-4.43941	-4.42539	-4.2219	-3.47459	-1.48851	79.3089	35.1669	28.4138	1.23767
	W-5	0	-0.632162	-0.44503	-0.316289	-0.22398	-0.00235332	0.356329	0.704335	0.921118	0.980987	0.945583	0.830425	0.645902	0.418399	0.168254	-0.0921437	-0.355499	-0.616605	-0.889679	-1.18296	-1.48844	-1.8197	-2.17777	-2.54144	-2.89607	-3.22737	-3.52468	-3.7857	-4.01122	-4.20365	-4.35969	-4.46233	-4.49221	-4.43399	-4.2	-3.42209	-1.44881	73.2307	30.274	25.982	1.16519
	W-10	0	-0.627762	-0.44983	-0.352189	-0.28068	-0.0720533	0.250029	0.543435	0.708018	0.728087	0.661683	0.522425	0.324202	0.084899	-0.175946	-0.444644	-0.713099	-0.976005	-1.24838	-1.53766	-1.83624	-2.158	-2.50397	-2.85324	-3.19157	-3.50527	-3.78048	-4.0128	-4.20632	-4.36445	-4.48429	-4.54833	-4.53741	-4.42989	-4.1549	-3.34289	-1.39871	66.6274	25.1572	23.1742	1.08557
	W-50	0	-0.655262	-0.57253	-0.558389	-0.48208	-0.368053	-0.325971	-0.411665	-0.577582	-0.767513	-0.994017	-1.24148	-1.5135	-1.8054	-2.09855	-2.38084	-2.6448	-2.8862	-3.12058	-3.35596	-3.58534	-3.8231	-4.07147	-4.31044	-4.52727	-4.71117	-4.85278	-4.945	-4.98432	-4.97055	-4.89859	-4.74953	-4.50061	-4.11959	-3.5413	-2.58379	-1.02401
	W-100	0	-0.749962	-0.72983	-0.654189	-0.64178	-0.752153	-0.969371	-1.26017	-1.59678	-1.95351	-2.31302	-2.66328	-2.996	-3.3075	-3.59265	-3.84544	-4.0626	-4.2424	-4.40208	-4.55146	-4.68484	-4.8178	-4.95407	-5.07484	-5.16847	-5.22507	-5.23668	-5.197	-5.10402	-4.95975	-4.75849	-4.47543	-4.08231	-3.54779	-2.8202	-1.86659	-0.702706
	W-300	0	-0.812562	-0.97953	-1.16729	-1.36278	-1.54505	-1.71737	-1.87347	-2.00768	-2.11421	-2.19012	-2.23368	-2.2434	-2.2215	-2.16785	-2.08234	-1.9668	-1.8243	-1.67598	-1.53516	-1.39964	-1.2879	-1.20617	-1.13824	-1.07517	-1.00977	-0.93688	-0.853903	-0.763222	-0.673248	-0.588495	-0.501734	-0.409812	-0.318488	-0.230905	-0.151793	-0.0942056
	W-500	0	-0.812562	-0.97953	-1.16729	-1.36278	-1.54505	-1.71737	-1.87347	-2.00768	-2.11421	-2.19012	-2.23368	-2.2434	-2.2215	-2.16785	-2.08234	-1.9668	-1.8243	-1.67598	-1.53516	-1.39964	-1.2879	-1.20617	-1.13824	-1.07517	-1.00977	-0.93688	-0.853903	-0.763222	-0.673248	-0.588495	-0.501734	-0.409812	-0.318488	-0.230905	-0.151793	-0.0942056
	W-1000	0	-0.812562	-0.97953	-1.16729	-1.36278	-1.54505	-1.71737	-1.87347	-2.00768	-2.11421	-2.19012	-2.23368	-2.2434	-2.2215	-2.16785	-2.08234	-1.9668	-1.8243	-1.67598	-1.53516	-1.39964	-1.2879	-1.20617	-1.13824	-1.07517	-1.00977	-0.93688	-0.853903	-0.763222	-0.673248	-0.588495	-0.501734	-0.409812	-0.318488	-0.230905	-0.151793	-0.0942056
	Beaufort 7	Angle of heel (φ)																																					Critical angle of heel φc	Cumulative GZ area up to φc	Cumulative HA area up to φc	DSI
		0°	5°	10°	15°	20°	25°	30°	35°	40°	45°	50°	55°	60°	65°	70°	75°	80°	85°	90°	95°	100°	105°	110°	115°	120°	125°	130°	135°	140°	145°	150°	155°	160°	165°	170°	175°	180°
	Lightship	0	-1.48459	-1.46553	-1.50315	-1.58481	-1.5335	-1.31659	-1.07987	-0.950638	-0.958108	-1.03936	-1.16886	-1.34047	-1.53123	-1.71455	-1.87634	-2.01131	-2.11899	-2.23603	-2.38404	-2.553	-2.77597	-3.06037	-3.36795	-3.67459	-3.95856	-4.20629	-4.41255	-4.57804	-4.71328	-4.82031	-4.87433	-4.85297	-4.75515	-4.46678	-3.64496	-1.59713
	D-0,5	0	-1.48459	-1.46623	-1.50595	-1.58971	-1.5402	-1.32599	-1.09287	-0.967238	-0.978008	-1.06176	-1.19336	-1.36697	-1.55893	-1.74305	-1.90544	-2.04091	-2.14889	-2.26623	-2.41404	-2.5826	-2.80497	-3.08867	-3.39505	-3.70029	-3.98276	-4.22859	-4.43235	-4.59554	-4.72808	-4.83221	-4.88323	-4.85847	-4.75675	-4.46588	-3.64116	-1.59353
	D-1	0	-1.48479	-1.46543	-1.50725	-1.59481	-1.5468	-1.33529	-1.10577	-0.983738	-0.997708	-1.08406	-1.21776	-1.39307	-1.58643	-1.77125	-1.93424	-2.07031	-2.17859	-2.29603	-2.44374	-2.6119	-2.83377	-3.11637	-3.42185	-3.72579	-4.00676	-4.25049	-4.45215	-4.61274	-4.74268	-4.84391	-4.89183	-4.86407	-4.75805	-4.46488	-3.63726	-1.59023
	D-5	0	-1.48429	-1.46943	-1.52815	-1.63221	-1.5962	-1.40609	-1.20517	-1.11244	-1.15101	-1.25586	-1.40766	-1.59617	-1.79683	-1.98745	-2.15554	-2.29551	-2.40629	-2.52413	-2.67064	-2.836	-3.05297	-3.32917	-3.62605	-3.91979	-4.18906	-4.41809	-4.60175	-4.74274	-4.85208	-4.93141	-4.95583	-4.90307	-4.76565	-4.45228	-3.60306	-1.56313
	D-10	0	-1.48279	-1.47393	-1.55305	-1.67441	-1.6497	-1.48529	-1.32127	-1.26474	-1.33191	-1.45936	-1.63026	-1.83027	-2.03923	-2.23715	-2.41144	-2.55571	-2.66839	-2.78613	-2.93024	-3.0913	-3.30207	-3.56987	-3.85705	-4.13949	-4.39506	-4.60709	-4.76995	-4.88814	-4.97308	-5.02631	-5.02323	-4.94107	-4.76785	-4.42708	-3.55286	-1.52883
	D-50	0	-1.48119	-1.53233	-1.73335	-1.87911	-1.8985	-1.93459	-2.05437	-2.27184	-2.50821	-2.74466	-3.00026	-3.26427	-3.52343	-3.75745	-3.95294	-4.10441	-4.21069	-4.30893	-4.42084	-4.5371	-4.69087	-4.89067	-5.09925	-5.29369	-5.45556	-5.56929	-5.62425	-5.61774	-5.55908	-5.45171	-5.27333	-5.00217	-4.61515	-4.04338	-3.03486	-1.26003
	D-100	0	-1.55659	-1.68853	-1.83185	-1.96561	-2.1242	-2.39389	-2.74647	-3.12144	-3.50851	-3.88286	-4.22956	-4.53897	-4.81423	-5.04935	-5.23344	-5.36131	-5.43279	-5.48543	-5.54154	-5.5927	-5.67267	-5.79067	-5.91035	-6.01009	-6.07196	-6.08189	-6.03035	-5.91744	-5.75288	-5.53521	-5.23403	-4.81957	-4.25975	-3.50008	-2.44036	-0.983629
	D-300	0	-1.64089	-1.99903	-2.51605	-3.14111	-3.8015	-4.47889	-5.14277	-5.76854	-6.33281	-6.82096	-7.22376	-7.53617	-7.76223	-7.90185	-7.95374	-7.92141	-7.81029	-7.66243	-7.50374	-7.3275	-7.16987	-7.04167	-6.90805	-6.74879	-6.54746	-6.29089	-5.97165	-5.46964	-5.28698	-4.69521	-4.16373	-3.55907	-2.88435	-2.14088	-1.34426	-0.542929
	D-500	0	-1.66409	-2.00603	-2.39055	-2.79091	-3.1642	-3.51709	-3.83677	-4.11164	-4.32981	-4.48526	-4.57446	-4.59437	-4.54953	-4.43965	-4.26454	-4.02791	-3.73609	-3.43233	-3.14394	-2.8664	-2.63757	-2.47017	-2.33105	-2.20189	-2.06796	-1.91869	-1.74875	-1.56304	-1.37878	-1.20521	-1.02753	-0.839275	-0.652249	-0.472882	-0.310865	-0.192929
	D-1000	0	-1.66409	-2.00603	-2.39055	-2.79091	-3.1642	-3.51709	-3.83677	-4.11164	-4.32981	-4.48526	-4.57446	-4.59437	-4.54953	-4.43965	-4.26454	-4.02791	-3.73609	-3.43233	-3.14394	-2.8664	-2.63757	-2.47017	-2.33105	-2.20189	-2.06796	-1.91869	-1.74875	-1.56304	-1.37878	-1.20521	-1.02753	-0.839275	-0.652249	-0.472882	-0.310865	-0.192929
	W-0,5	0	-1.48489	-1.46503	-1.50575	-1.59211	-1.5433	-1.33019	-1.09877	-0.974738	-0.987008	-1.07186	-1.20456	-1.37877	-1.57153	-1.75585	-1.91864	-2.05431	-2.16249	-2.27973	-2.42764	-2.596	-2.81807	-3.10127	-3.40735	-3.71189	-3.99376	-4.23849	-4.44145	-4.60334	-4.73478	-4.83751	-4.88723	-4.86107	-4.75725	-4.46548	-3.63936	-1.59213
	W-1	0	-1.48479	-1.46583	-1.50975	-1.59921	-1.5528	-1.34369	-1.11727	-0.998738	-1.01561	-1.10396	-1.23986	-1.41677	-1.61113	-1.79665	-1.96024	-2.09671	-2.20539	-2.32283	-2.47044	-2.6384	-2.85947	-3.14157	-3.44595	-3.74869	-4.02826	-4.27029	-4.46985	-4.62814	-4.75568	-4.85441	-4.89973	-4.86887	-4.75915	-4.46388	-3.63366	-1.58723
	W-5	0	-1.48369	-1.47153	-1.53955	-1.65211	-1.6215	-1.44339	-1.25897	-1.18284	-1.23461	-1.34956	-1.51036	-1.70507	-1.90963	-2.10355	-2.27434	-2.41661	-2.52839	-2.64603	-2.79174	-2.9552	-3.16937	-3.44177	-3.73425	-4.02279	-4.28556	-4.50649	-4.68055	-4.81104	-4.90918	-4.97641	-4.98813	-4.92167	-4.76775	-4.44198	-3.58116	-1.54753
	W-10	0	-1.47929	-1.47633	-1.57545	-1.70881	-1.6912	-1.54969	-1.41987	-1.39594	-1.48751	-1.63346	-1.81836	-2.02677	-2.24313	-2.44775	-2.62684	-2.77421	-2.88779	-3.00473	-3.14644	-3.303	-3.50767	-3.76797	-4.04605	-4.31829	-4.56346	-4.76229	-4.90765	-5.00614	-5.06998	-5.10101	-5.07413	-4.96687	-4.76365	-4.39688	-3.50196	-1.49743
	W-50	0	-1.50679	-1.59903	-1.78165	-1.91021	-1.9872	-2.12569	-2.37497	-2.68154	-2.98311	-3.28916	-3.58226	-3.86447	-4.13343	-4.37035	-4.56304	-4.70591	-4.79799	-4.87693	-4.96474	-5.0521	-5.17277	-5.33547	-5.50325	-5.65399	-5.76936	-5.83459	-5.83985	-5.78414	-5.67608	-5.51531	-5.27533	-4.93007	-4.45335	-3.78328	-2.74286	-1.12273
	W-100	0	-1.60149	-1.75633	-1.87745	-2.06991	-2.3713	-2.76909	-3.22347	-3.70074	-4.16911	-4.60816	-5.00406	-5.34697	-5.63553	-5.86445	-6.02764	-6.12371	-6.15419	-6.15843	-6.16024	-6.1516	-6.16747	-6.21807	-6.26765	-6.29519	-6.28326	-6.21849	-6.09185	-5.90384	-5.66528	-5.37521	-5.00123	-4.51177	-3.88155	-3.06218	-2.02566	-0.801429
	W-300	0	-1.66409	-2.00603	-2.39055	-2.79091	-3.1642	-3.51709	-3.83677	-4.11164	-4.32981	-4.48526	-4.57446	-4.59437	-4.54953	-4.43965	-4.26454	-4.02791	-3.73609	-3.43233	-3.14394	-2.8664	-2.63757	-2.47017	-2.33105	-2.20189	-2.06796	-1.91869	-1.74875	-1.56304	-1.37878	-1.20521	-1.02753	-0.839275	-0.652249	-0.472882	-0.310865	-0.192929
	W-500	0	-1.66409	-2.00603	-2.39055	-2.79091	-3.1642	-3.51709	-3.83677	-4.11164	-4.32981	-4.48526	-4.57446	-4.59437	-4.54953	-4.43965	-4.26454	-4.02791	-3.73609	-3.43233	-3.14394	-2.8664	-2.63757	-2.47017	-2.33105	-2.20189	-2.06796	-1.91869	-1.74875	-1.56304	-1.37878	-1.20521	-1.02753	-0.839275	-0.652249	-0.472882	-0.310865	-0.192929
	W-1000	0	-1.66409	-2.00603	-2.39055	-2.79091	-3.1642	-3.51709	-3.83677	-4.11164	-4.32981	-4.48526	-4.57446	-4.59437	-4.54953	-4.43965	-4.26454	-4.02791	-3.73609	-3.43233	-3.14394	-2.8664	-2.63757	-2.47017	-2.33105	-2.20189	-2.06796	-1.91869	-1.74875	-1.56304	-1.37878	-1.20521	-1.02753	-0.839275	-0.652249	-0.472882	-0.310865	-0.192929

## Sheet: LAS outputs - MSB
	Maxsurf LAS stability outputs and post-processing for a MSB
	Righting arm GZ [m]
	Test ID	Angle of heel (φ)
		0°	5°	10°	15°	20°	25°	30°	35°	40°	45°	50°	55°	60°	65°	70°	75°	80°	85°	90°	95°	100°	105°	110°	115°	120°	125°	130°	135°	140°	145°	150°	155°	160°	165°	170°	175°	180°
	Lightship	0	0.132	0.245	0.331	0.386	0.403	0.393	0.363	0.32	0.266	0.204	0.137	0.067	-0.004	-0.073	-0.14	-0.214	-0.293	-0.37	-0.446	-0.518	-0.585	-0.645	-0.7	-0.75	-0.794	-0.829	-0.855	-0.87	-0.872	-0.857	-0.82	-0.752	-0.641	-0.47	-0.24	0
	D-0,5	0	0.131	0.245	0.331	0.386	0.403	0.393	0.363	0.319	0.265	0.204	0.137	0.066	-0.005	-0.073	-0.141	-0.215	-0.293	-0.371	-0.446	-0.518	-0.585	-0.645	-0.7	-0.75	-0.793	-0.829	-0.855	-0.87	-0.872	-0.857	-0.82	-0.751	-0.64	-0.47	-0.24	0
	D-1	0	0.131	0.245	0.331	0.385	0.403	0.392	0.362	0.319	0.265	0.203	0.136	0.066	-0.006	-0.074	-0.142	-0.215	-0.294	-0.371	-0.446	-0.518	-0.585	-0.645	-0.7	-0.75	-0.793	-0.828	-0.854	-0.869	-0.871	-0.856	-0.819	-0.751	-0.64	-0.469	-0.24	0
	D-5	0	0.13	0.243	0.329	0.383	0.399	0.388	0.358	0.314	0.259	0.197	0.13	0.06	-0.012	-0.081	-0.148	-0.22	-0.298	-0.374	-0.449	-0.52	-0.586	-0.645	-0.7	-0.749	-0.791	-0.826	-0.851	-0.866	-0.867	-0.852	-0.814	-0.746	-0.635	-0.465	-0.237	0
	D-10	0	0.129	0.241	0.327	0.38	0.396	0.383	0.352	0.307	0.253	0.191	0.123	0.053	-0.019	-0.089	-0.156	-0.226	-0.302	-0.378	-0.452	-0.522	-0.587	-0.645	-0.699	-0.747	-0.789	-0.823	-0.848	-0.861	-0.862	-0.846	-0.808	-0.74	-0.629	-0.459	-0.234	0
	D-50	0	0.119	0.226	0.31	0.355	0.362	0.343	0.307	0.259	0.201	0.137	0.069	-0.002	-0.074	-0.146	-0.216	-0.28	-0.344	-0.41	-0.476	-0.539	-0.595	-0.647	-0.694	-0.737	-0.772	-0.8	-0.818	-0.826	-0.822	-0.801	-0.761	-0.691	-0.581	-0.416	-0.211	0
	D-100	0	0.107	0.206	0.283	0.317	0.315	0.29	0.249	0.197	0.137	0.073	0.005	-0.065	-0.136	-0.206	-0.275	-0.342	-0.403	-0.458	-0.511	-0.56	-0.608	-0.653	-0.692	-0.726	-0.753	-0.773	-0.784	-0.785	-0.774	-0.748	-0.703	-0.633	-0.525	-0.369	-0.188	0
	D-300	0	0.069	0.12	0.134	0.121	0.09	0.047	-0.004	-0.059	-0.117	-0.175	-0.234	-0.293	-0.349	-0.403	-0.454	-0.501	-0.544	-0.583	-0.619	-0.649	-0.674	-0.693	-0.704	-0.706	-0.699	-0.686	-0.667	-0.639	-0.603	-0.556	-0.497	-0.424	-0.337	-0.238	-0.124	0
	D-500	0	-0.003	-0.033	-0.077	-0.127	-0.18	-0.233	-0.287	-0.339	-0.39	-0.438	-0.483	-0.524	-0.56	-0.592	-0.619	-0.642	-0.66	-0.674	-0.683	-0.687	-0.686	-0.68	-0.669	-0.652	-0.629	-0.6	-0.565	-0.522	-0.47	-0.411	-0.348	-0.282	-0.214	-0.143	-0.071	0
	D-1000	0	0	0	0	0	0	0	0	0	0	0	0	0	0	0	0	0	0	0	0	0	0	0	0	0	0	0	0	0	0	0	0	0	0	0	0	0
	W-0,5	0	0.132	0.245	0.331	0.386	0.404	0.394	0.364	0.321	0.267	0.205	0.139	0.068	-0.003	-0.071	-0.139	-0.213	-0.292	-0.37	-0.445	-0.517	-0.585	-0.645	-0.7	-0.751	-0.794	-0.829	-0.856	-0.871	-0.873	-0.858	-0.821	-0.753	-0.642	-0.471	-0.241	0
	W-1	0	0.132	0.245	0.331	0.386	0.403	0.393	0.363	0.32	0.266	0.204	0.137	0.067	-0.004	-0.073	-0.14	-0.214	-0.293	-0.37	-0.446	-0.518	-0.585	-0.645	-0.7	-0.75	-0.794	-0.829	-0.855	-0.87	-0.872	-0.857	-0.82	-0.752	-0.641	-0.47	-0.24	0
	W-5	0	0.13	0.243	0.329	0.383	0.399	0.387	0.357	0.313	0.258	0.196	0.129	0.059	-0.013	-0.082	-0.149	-0.221	-0.298	-0.375	-0.449	-0.52	-0.586	-0.645	-0.7	-0.749	-0.791	-0.826	-0.851	-0.865	-0.866	-0.851	-0.813	-0.745	-0.634	-0.464	-0.237	0
	W-10	0	0.128	0.24	0.326	0.378	0.393	0.38	0.349	0.304	0.249	0.186	0.119	0.048	-0.024	-0.094	-0.161	-0.23	-0.305	-0.38	-0.453	-0.523	-0.588	-0.645	-0.698	-0.746	-0.788	-0.821	-0.845	-0.858	-0.859	-0.843	-0.804	-0.736	-0.625	-0.455	-0.232	0
	W-50	0	0.114	0.218	0.3	0.34	0.344	0.322	0.284	0.234	0.175	0.111	0.043	-0.027	-0.099	-0.171	-0.241	-0.307	-0.367	-0.427	-0.488	-0.546	-0.598	-0.647	-0.691	-0.73	-0.762	-0.786	-0.802	-0.807	-0.8	-0.777	-0.735	-0.666	-0.556	-0.395	-0.2	0
	W-100	0	0.097	0.19	0.258	0.282	0.274	0.244	0.199	0.146	0.087	0.023	-0.044	-0.111	-0.18	-0.247	-0.313	-0.377	-0.438	-0.492	-0.536	-0.578	-0.618	-0.655	-0.687	-0.714	-0.734	-0.746	-0.751	-0.745	-0.729	-0.699	-0.652	-0.581	-0.476	-0.333	-0.171	0
	W-300	0	0.037	0.034	0.009	-0.029	-0.073	-0.12	-0.17	-0.22	-0.27	-0.319	-0.366	-0.411	-0.452	-0.49	-0.525	-0.557	-0.584	-0.608	-0.626	-0.64	-0.649	-0.653	-0.651	-0.643	-0.63	-0.609	-0.578	-0.537	-0.489	-0.434	-0.373	-0.307	-0.238	-0.164	-0.084	0
	W-500	0	0	0	0	0	0	0	0	0	0	0	0	0	0	0	0	0	0	0	0	0	0	0	0	0	0	0	0	0	0	0	0	0	0	0	0	0
	W-1000	0	0	0	0	0	0	0	0	0	0	0	0	0	0	0	0	0	0	0	0	0	0	0	0	0	0	0	0	0	0	0	0	0	0	0	0	0
	Cumulative area under the righting arm GZ [m.deg]
	Test ID	Angle of heel (φ)
		0°	5°	10°	15°	20°	25°	30°	35°	40°	45°	50°	55°	60°	65°	70°	75°	80°	85°	90°	95°	100°	105°	110°	115°	120°	125°	130°	135°	140°	145°	150°	155°	160°	165°	170°	175°	180°
	Lightship	0	0.3329	1.2844	2.7371	4.5442	6.5314	8.5322	10.4304	12.1435	13.6113	14.7896	15.646	16.1588	16.3157	16.1223	15.592	14.7088	13.4417	11.7833	9.7427	7.3326	4.5724	1.4938	-1.8719	-5.501	-9.3641	-13.4245	-17.639	-21.9571	-26.3188	-30.6502	-34.8546	-38.7998	-42.3028	-45.1082	-46.8996	-47.5002
	D-0,5	0	0.3325	1.2833	2.7349	4.5408	6.5264	8.525	10.4206	12.1306	13.5953	14.7701	15.6229	16.1321	16.2852	16.0877	15.5533	14.6667	13.3969	11.7363	9.6939	7.2826	4.5216	1.4427	-1.9228	-5.5515	-9.4136	-13.4727	-17.6855	-22.0016	-26.3609	-30.6896	-34.8911	-38.8333	-42.3332	-45.1356	-46.9247	-47.5243
	D-1	0	0.3322	1.2821	2.7327	4.5375	6.5214	8.5178	10.4107	12.1178	13.5792	14.7506	15.5999	16.1054	16.2548	16.0532	15.5146	14.6246	13.3522	11.6894	9.6453	7.2326	4.4708	1.3917	-1.9737	-5.6018	-9.4631	-13.5208	-17.7319	-22.0459	-26.4029	-30.7289	-34.9275	-38.8666	-42.3635	-45.1629	-46.9496	-47.5484
	D-5	0	0.3295	1.2727	2.7154	4.5106	6.481	8.4598	10.3317	12.0152	13.4509	14.5952	15.4163	15.8929	16.0125	15.7788	15.2072	14.2899	12.9965	11.3162	9.2582	6.8351	4.067	0.986	-2.378	-6.0019	-9.8558	-13.9031	-18.1006	-22.3982	-26.7361	-31.0406	-35.2159	-39.1306	-42.6029	-45.3783	-47.1465	-47.7386
	D-10	0	0.3261	1.2609	2.6938	4.477	6.4303	8.387	10.2329	11.887	13.291	14.4019	15.1884	15.6295	15.7129	15.4403	14.8282	13.8761	12.5561	10.8543	8.7791	6.3433	3.5677	0.4846	-2.8776	-6.496	-10.3405	-14.3746	-18.555	-22.8319	-27.1459	-31.4235	-35.5695	-39.4536	-42.8953	-45.6409	-47.3864	-47.9703
	D-50	0	0.2997	1.1674	2.5187	4.197	6.0021	7.7744	9.407	10.8257	11.9781	12.8267	13.3449	13.5148	13.3263	12.7756	11.8689	10.6281	9.0695	7.1858	4.9693	2.4294	-0.4067	-3.5118	-6.8667	-10.4472	-14.222	-18.1544	-22.2025	-26.318	-30.4436	-34.5088	-38.4239	-42.0674	-45.2692	-47.785	-49.3623	-49.8893
	D-100	0	0.268	1.0545	2.2926	3.8126	5.4061	6.9272	8.2794	9.3971	10.2353	10.763	10.9592	10.8107	10.3101	9.4558	8.2515	6.7065	4.841	2.6864	0.2642	-2.4144	-5.3368	-8.4906	-11.8559	-15.4056	-19.1081	-22.9273	-26.8229	-30.7483	-34.6489	-38.4592	-42.0963	-45.45	-48.3641	-50.6164	-52.0158	-52.487
	D-300	0	0.1761	0.6622	1.3131	1.9615	2.4962	2.842	2.9521	2.797	2.3592	1.6293	0.6045	-0.7133	-2.318	-4.1999	-6.3455	-8.7371	-11.3518	-14.1707	-17.1776	-20.3504	-23.6625	-27.0837	-30.5781	-34.1052	-37.6199	-41.0852	-44.4704	-47.7386	-50.8484	-53.7519	-56.3926	-58.7011	-60.606	-62.0473	-62.9586	-63.272
	D-500	0	-0.0006	-0.0808	-0.3518	-0.8604	-1.6272	-2.6603	-3.9603	-5.5248	-7.3487	-9.4211	-11.727	-14.2469	-16.9594	-19.8425	-22.8729	-26.0271	-29.2832	-32.6201	-36.0149	-39.4432	-42.8798	-46.2987	-49.6733	-52.9765	-56.1803	-59.2563	-62.1741	-64.8971	-67.3817	-69.5855	-71.4829	-73.0593	-74.2995	-75.1912	-75.7265	-75.9044
	D-1000	0	0	0	0	0	0	0	0	0	0	0	0	0	0	0	0	0	0	0	0	0	0	0	0	0	0	0	0	0	0	0	0	0	0	0	0	0
	W-0,5	0	0.3334	1.2862	2.7402	4.5491	6.5388	8.5428	10.4448	12.1622	13.6347	14.818	15.6796	16.1977	16.3602	16.1727	15.6485	14.7703	13.5069	11.8518	9.8137	7.4056	4.6466	1.5685	-1.7975	-5.4274	-9.2918	-13.3541	-17.571	-21.8921	-26.2573	-30.5925	-34.8012	-38.7509	-42.2583	-45.0682	-46.863	-47.4647
	W-1	0	0.3329	1.2844	2.7371	4.5442	6.5314	8.5322	10.4304	12.1435	13.6113	14.7896	15.646	16.1588	16.3157	16.1223	15.592	14.7088	13.4417	11.7833	9.7427	7.3326	4.5724	1.4938	-1.8719	-5.501	-9.3641	-13.4245	-17.639	-21.9571	-26.3188	-30.6502	-34.8546	-38.7998	-42.3028	-45.1082	-46.8996	-47.5002
	W-5	0	0.3289	1.2708	2.7119	4.5051	6.4727	8.4479	10.3156	11.9943	13.4248	14.5636	15.3792	15.8499	15.9635	15.7233	15.1451	14.2221	12.9244	11.2406	9.1798	6.7546	3.9852	0.9039	-2.4599	-6.0828	-9.9352	-13.9803	-18.1751	-22.4693	-26.8033	-31.1035	-35.274	-39.1836	-42.651	-45.4215	-47.186	-47.7768
	W-10	0	0.3241	1.2537	2.6805	4.4562	6.3988	8.3419	10.1717	11.8077	13.1923	14.2826	15.048	15.4676	15.529	15.233	14.5963	13.6225	12.2857	10.5707	8.4851	6.0415	3.2614	0.1771	-3.184	-6.7989	-10.6375	-14.6632	-18.8331	-23.0971	-27.3962	-31.6571	-35.7849	-39.6501	-43.0729	-45.8002	-47.5317	-48.1108
	W-50	0	0.2864	1.1203	2.4272	4.0449	5.7673	7.44	8.9607	10.2587	11.2845	12.0034	12.3913	12.4321	12.1169	11.4424	10.4119	9.0405	7.3554	5.3705	3.0809	0.4938	-2.3661	-5.4787	-8.8262	-12.3825	-16.1159	-19.9903	-23.9643	-27.9904	-32.0127	-35.9625	-39.7531	-43.268	-46.3428	-48.7408	-50.2368	-50.7379
	W-100	0	0.2437	0.9684	2.1055	3.4735	4.8735	6.1732	7.2854	8.1525	8.7363	9.0109	8.9594	8.5719	7.8441	6.7765	5.3742	3.6466	1.6074	-0.7207	-3.2946	-6.0808	-9.0712	-12.2549	-15.612	-19.1162	-22.7371	-26.4399	-30.1855	-33.9293	-37.6198	-41.1961	-44.582	-47.6763	-50.3367	-52.3737	-53.6388	-54.0677
	W-300	0	0.1037	0.2957	0.408	0.3614	0.1097	-0.371	-1.095	-2.0688	-3.2937	-4.7661	-6.4787	-8.421	-10.5794	-12.9374	-15.4775	-18.1834	-21.0376	-24.0195	-27.1067	-30.2757	-33.5019	-36.7595	-40.0216	-43.2602	-46.4459	-49.5453	-52.517	-55.309	-57.8772	-60.188	-62.2068	-63.9087	-65.2741	-66.2806	-66.9027	-67.1142
	W-500	0	0	0	0	0	0	0	0	0	0	0	0	0	0	0	0	0	0	0	0	0	0	0	0	0	0	0	0	0	0	0	0	0	0	0	0	0
	W-1000	0	0	0	0	0	0	0	0	0	0	0	0	0	0	0	0	0	0	0	0	0	0	0	0	0	0	0	0	0	0	0	0	0	0	0	0	0
	Heeling arm HA [m]
		Angle of heel (φ)
		0°	5°	10°	15°	20°	25°	30°	35°	40°	45°	50°	55°	60°	65°	70°	75°	80°	85°	90°	95°	100°	105°	110°	115°	120°	125°	130°	135°	140°	145°	150°	155°	160°	165°	170°	175°	180°
	Beaufort 3	0.035405	0.0451521	0.0554171	0.0658752	0.076226	0.0862307	0.0955784	0.103914	0.111156	0.116875	0.12118	0.123702	0.124393	0.123567	0.120934	0.116615	0.110694	0.103306	0.0959862	0.0901779	0.0842719	0.0786387	0.0729418	0.0666224	0.0600146	0.0533211	0.0465414	0.039676	0.0333107	0.0281241	0.0243512	0.0224873	0.0229615	0.0238611	0.0243886	0.0245302	0.0243649
	Beaufort 5	0.0874287	0.111498	0.136846	0.162671	0.188232	0.212937	0.23602	0.256604	0.274487	0.288609	0.299239	0.305467	0.307175	0.305136	0.298634	0.287969	0.273346	0.255101	0.237027	0.222684	0.2081	0.194189	0.180121	0.164517	0.148199	0.131671	0.114929	0.0979755	0.0822571	0.0694493	0.0601327	0.0555298	0.0567008	0.0589223	0.0602249	0.0605746	0.0601664
	Beaufort 7	0.177346	0.22617	0.277588	0.329974	0.381821	0.431936	0.478759	0.520513	0.556788	0.585434	0.606997	0.61963	0.623094	0.618957	0.605768	0.584135	0.554473	0.517465	0.480801	0.451707	0.422124	0.393907	0.36537	0.333716	0.300617	0.267089	0.233129	0.19874	0.166856	0.140876	0.121977	0.11264	0.115016	0.119522	0.122164	0.122873	0.122046
	Cumulative area under the heeling arm HA [m.deg]
	Test ID	Angle of heel (φ)
		0°	5°	10°	15°	20°	25°	30°	35°	40°	45°	50°	55°	60°	65°	70°	75°	80°	85°	90°	95°	100°	105°	110°	115°	120°	125°	130°	135°	140°	145°	150°	155°	160°	165°	170°	175°	180°
	Beaufort 3	0	0.201393	0.452816	0.756047	1.1113	1.51744	1.97196	2.4707	3.00837	3.57845	4.17358	4.78579	5.40602	6.02592	6.63718	7.23105	7.79932	8.33432	8.83255	9.29796	9.73409	10.1414	10.5203	10.8692	11.1858	11.4692	11.7188	11.9344	12.1168	12.2704	12.4016	12.5187	12.6323	12.7494	12.87	12.9923	13.1145
	Beaufort 5	0	0.497317	1.11818	1.86697	2.74423	3.74715	4.86954	6.1011	7.42883	8.83657	10.3062	11.818	13.3496	14.8803	16.3898	17.8563	19.2596	20.5807	21.811	22.9603	24.0372	25.043	25.9787	26.8403	27.6221	28.3218	28.9383	29.4706	29.9211	30.3004	30.6244	30.9135	31.1941	31.4831	31.781	32.083	32.3849
	Beaufort 7	0	1.00879	2.26819	3.78709	5.56658	7.60097	9.87771	12.3759	15.0691	17.9247	20.9058	23.9723	27.0791	30.1843	33.2461	36.2208	39.0674	41.7472	44.2429	46.5741	48.7587	50.7988	52.697	54.4447	56.0305	57.4498	58.7004	59.78	60.694	61.4633	62.1205	62.707	63.2762	63.8625	64.4667	65.0793	65.6916
	Discrete area under GZ and HA differences for critical heel and DSI computation
	Beaufort 3	Angle of heel (φ)																																					Critical angle of heel φc	Cumulative GZ area up to φc	Cumulative HA area up to φc	DSI
		0°	5°	10°	15°	20°	25°	30°	35°	40°	45°	50°	55°	60°	65°	70°	75°	80°	85°	90°	95°	100°	105°	110°	115°	120°	125°	130°	135°	140°	145°	150°	155°	160°	165°	170°	175°	180°
	Lightship	0	0.131507	0.700077	1.14947	1.45185	1.58106	1.54628	1.39947	1.17543	0.897723	0.583164	0.244197	-0.107437	-0.463001	-0.804654	-1.12417	-1.45147	-1.8021	-2.15663	-2.50601	-2.84622	-3.16748	-3.45755	-3.71461	-3.94569	-4.14644	-4.31006	-4.43004	-4.50057	-4.51529	-4.46259	-4.3215	-4.05882	-3.62006	-2.92602	-1.9137	-0.722838	58.4723	16.0021	5.21652	3.06759
	D-0,5	0	0.131107	0.699377	1.14837	1.45065	1.57946	1.54408	1.39687	1.17233	0.894623	0.579664	0.240597	-0.111037	-0.466801	-0.808754	-1.12827	-1.45487	-1.8048	-2.15883	-2.50781	-2.84742	-3.16828	-3.45785	-3.71441	-3.94529	-4.14544	-4.30876	-4.42834	-4.49857	-4.51289	-4.45989	-4.3186	-4.05582	-3.61696	-2.92302	-1.9114	-0.721838	58.4211	15.9713	5.21017	3.06541
	D-1	0	0.130807	0.698477	1.14737	1.44955	1.57776	1.54188	1.39417	1.16943	0.891323	0.576264	0.237097	-0.114737	-0.470501	-0.812854	-1.13247	-1.45827	-1.8074	-2.16103	-2.50951	-2.84882	-3.16908	-3.45805	-3.71431	-3.94469	-4.14464	-4.30736	-4.42664	-4.49647	-4.51059	-4.45719	-4.3157	-4.05272	-3.61396	-2.92002	-1.909	-0.721038	58.3694	15.9406	5.20376	3.06328
	D-5	0	0.128107	0.691777	1.13947	1.43995	1.56426	1.52428	1.37317	1.14583	0.865623	0.549164	0.208897	-0.143637	-0.500301	-0.844954	-1.16547	-1.48557	-1.8284	-2.17853	-2.52341	-2.85922	-3.17538	-3.45995	-3.71291	-3.94049	-4.13724	-4.29696	-4.41304	-4.48007	-4.49149	-4.43569	-4.2924	-4.02832	-3.58936	-2.89602	-1.8905	-0.714338	57.9628	15.6987	5.15331	3.04633
	D-10	0	0.124707	0.683377	1.12967	1.42795	1.54716	1.50218	1.34717	1.11643	0.833923	0.515764	0.174297	-0.179137	-0.536501	-0.883854	-1.20597	-1.52037	-1.855	-2.20003	-2.54061	-2.87192	-3.18288	-3.46205	-3.71111	-3.93499	-4.12784	-4.28376	-4.39594	-4.45937	-4.46759	-4.40879	-4.2631	-3.99772	-3.55876	-2.86622	-1.8678	-0.706138	57.4658	15.4059	5.09166	3.02572
	D-50	0	0.0983072	0.616277	1.04807	1.32305	1.39896	1.31778	1.13387	0.881025	0.582323	0.253464	-0.0940029	-0.450337	-0.808401	-1.16195	-1.50057	-1.80907	-2.0936	-2.38193	-2.68191	-2.97602	-3.24338	-3.48405	-3.70381	-3.89709	-4.05814	-4.18206	-4.26364	-4.29797	-4.27919	-4.19639	-4.0322	-3.75712	-3.31886	-2.63642	-1.6996	-0.649238	53.6473	13.2047	4.62016	2.85806
	D-100	0	0.0666072	0.535077	0.934869	1.16475	1.18736	1.06658	0.853469	0.580025	0.268123	-0.0674358	-0.416003	-0.768737	-1.1205	-1.46555	-1.79817	-2.11327	-2.4005	-2.65283	-2.88761	-3.11472	-3.32968	-3.53275	-3.71421	-3.86629	-3.98584	-4.06886	-4.11114	-4.10787	-4.05419	-3.94149	-3.7542	-3.46732	-3.03116	-2.37292	-1.5217	-0.593438	48.9952	10.657	4.05398	2.62876
	D-300	0	-0.0252928	0.234677	0.347669	0.293147	0.128558	-0.108723	-0.388631	-0.692775	-1.00788	-1.32504	-1.637	-1.93804	-2.2246	-2.49315	-2.73947	-2.95987	-3.1497	-3.31713	-3.47231	-3.60892	-3.71938	-3.80015	-3.84331	-3.84369	-3.79804	-3.71496	-3.60074	-3.45067	-3.26339	-3.03469	-2.7578	-2.42212	-2.02196	-1.56192	-1.0336	-0.435638	27.709	2.68355	1.7637	1.52155
	D-500	0	-0.201993	-0.331623	-0.574231	-0.863853	-1.17294	-1.48762	-1.79873	-2.10217	-2.39398	-2.66754	-2.9181	-3.14014	-3.3324	-3.49435	-3.62427	-3.72247	-3.7911	-3.83513	-3.86021	-3.86442	-3.84388	-3.79785	-3.72351	-3.61979	-3.48714	-3.32566	-3.13334	-2.90547	-2.63819	-2.33499	-2.0145	-1.69002	-1.35726	-1.01232	-0.657597	-0.300138
	D-1000	0	-0.201393	-0.251423	-0.303231	-0.355253	-0.406142	-0.454523	-0.498731	-0.537675	-0.570077	-0.595136	-0.612203	-0.620237	-0.619901	-0.611254	-0.593874	-0.568273	-0.534998	-0.498229	-0.46541	-0.436125	-0.407276	-0.378951	-0.34891	-0.316593	-0.283339	-0.249656	-0.215544	-0.182467	-0.153587	-0.131188	-0.117096	-0.113622	-0.117057	-0.120624	-0.122297	-0.122238
	W-0,5	0	0.132007	0.701377	1.15077	1.45365	1.58356	1.54948	1.40327	1.17973	0.902423	0.588164	0.249397	-0.102137	-0.457401	-0.798754	-1.11807	-1.44647	-1.7984	-2.15333	-2.50351	-2.84422	-3.16628	-3.45705	-3.71491	-3.94649	-4.14774	-4.31196	-4.43244	-4.50357	-4.51879	-4.46639	-4.3258	-4.06332	-3.62446	-2.93052	-1.9171	-0.723938	58.5473	16.0472	5.22581	3.07075
	W-1	0	0.131507	0.700077	1.14947	1.45185	1.58106	1.54628	1.39947	1.17543	0.897723	0.583164	0.244197	-0.107437	-0.463001	-0.804654	-1.12417	-1.45147	-1.8021	-2.15663	-2.50601	-2.84622	-3.16748	-3.45755	-3.71461	-3.94569	-4.14644	-4.31006	-4.43004	-4.50057	-4.51529	-4.46259	-4.3215	-4.05882	-3.62006	-2.92602	-1.9137	-0.722838	58.4723	16.0021	5.21652	3.06759
	W-5	0	0.127507	0.690477	1.13787	1.43795	1.56146	1.52068	1.36897	1.14103	0.860423	0.543664	0.203397	-0.149537	-0.506301	-0.851454	-1.17207	-1.49127	-1.8327	-2.18203	-2.52621	-2.86132	-3.17668	-3.46025	-3.71271	-3.93949	-4.13574	-4.29476	-4.41034	-4.47667	-4.48759	-4.43139	-4.2876	-4.02322	-3.58446	-2.89112	-1.8868	-0.713038	57.8815	15.6505	5.14323	3.04293
	W-10	0	0.122707	0.678177	1.12357	1.42045	1.53646	1.48858	1.33107	1.09833	0.814523	0.495164	0.153197	-0.200637	-0.558501	-0.907254	-1.23057	-1.54207	-1.8718	-2.21323	-2.55101	-2.87972	-3.18738	-3.46325	-3.71001	-3.93149	-4.12194	-4.27536	-4.38544	-4.44647	-4.45269	-4.39209	-4.2449	-3.97882	-3.53986	-2.84792	-1.8538	-0.701338	57.1648	15.2297	5.05433	3.0132
	W-50	0	0.0850072	0.582477	1.00367	1.26245	1.31626	1.21818	1.02197	0.760325	0.455723	0.123764	-0.224303	-0.579437	-0.935101	-1.28575	-1.62437	-1.93967	-2.2201	-2.48313	-2.75501	-3.02322	-3.26718	-3.49155	-3.69641	-3.87289	-4.01674	-4.12406	-4.18954	-4.20857	-4.17589	-4.08099	-3.9077	-3.62852	-3.19186	-2.51862	-1.6183	-0.623338	51.7779	12.1413	4.39127	2.76488
	W-100	0	0.0423072	0.473277	0.833869	1.01275	0.993858	0.845177	0.613469	0.329425	0.0137234	-0.320536	-0.663703	-1.00774	-1.3477	-1.67885	-1.99617	-2.29587	-2.5742	-2.82633	-3.03931	-3.22232	-3.39768	-3.56265	-3.70601	-3.82079	-3.90424	-3.95246	-3.96114	-3.92627	-3.84409	-3.70749	-3.503	-3.20792	-2.77746	-2.15762	-1.3874	-0.551138	45.2053	8.74757	3.60288	2.42794
	W-300	0	-0.0976928	-0.0594231	-0.190931	-0.401853	-0.657842	-0.935223	-1.22273	-1.51147	-1.79498	-2.06754	-2.3248	-2.56254	-2.7783	-2.96925	-3.13397	-3.27417	-3.3892	-3.48013	-3.55261	-3.60512	-3.63348	-3.63655	-3.61101	-3.55519	-3.46904	-3.34906	-3.18724	-2.97447	-2.72179	-2.44199	-2.1359	-1.81552	-1.48246	-1.12712	-0.744397	-0.333738
	W-500	0	-0.201393	-0.251423	-0.303231	-0.355253	-0.406142	-0.454523	-0.498731	-0.537675	-0.570077	-0.595136	-0.612203	-0.620237	-0.619901	-0.611254	-0.593874	-0.568273	-0.534998	-0.498229	-0.46541	-0.436125	-0.407276	-0.378951	-0.34891	-0.316593	-0.283339	-0.249656	-0.215544	-0.182467	-0.153587	-0.131188	-0.117096	-0.113622	-0.117057	-0.120624	-0.122297	-0.122238
	W-1000	0	-0.201393	-0.251423	-0.303231	-0.355253	-0.406142	-0.454523	-0.498731	-0.537675	-0.570077	-0.595136	-0.612203	-0.620237	-0.619901	-0.611254	-0.593874	-0.568273	-0.534998	-0.498229	-0.46541	-0.436125	-0.407276	-0.378951	-0.34891	-0.316593	-0.283339	-0.249656	-0.215544	-0.182467	-0.153587	-0.131188	-0.117096	-0.113622	-0.117057	-0.120624	-0.122297	-0.122238
	Beaufort 5	Angle of heel (φ)																																					Critical angle of heel φc	Cumulative GZ area up to φc	Cumulative HA area up to φc	DSI
		0°	5°	10°	15°	20°	25°	30°	35°	40°	45°	50°	55°	60°	65°	70°	75°	80°	85°	90°	95°	100°	105°	110°	115°	120°	125°	130°	135°	140°	145°	150°	155°	160°	165°	170°	175°	180°
	Lightship	0	-0.164417	0.330639	0.703906	0.929843	0.984279	0.878407	0.66664	0.385372	0.0600597	-0.291321	-0.655366	-1.01881	-1.37388	-1.70282	-1.99681	-2.28649	-2.58822	-2.88872	-3.18988	-3.48706	-3.76592	-4.01438	-4.2273	-4.41089	-4.56277	-4.6769	-4.74676	-4.76868	-4.74097	-4.65535	-4.49356	-4.22578	-3.79206	-3.10327	-2.0934	-0.902452	45.8546	13.8127	9.08777	1.51992
	D-0,5	0	-0.164817	0.329939	0.702806	0.928643	0.982679	0.876207	0.66404	0.382272	0.0569597	-0.294821	-0.658966	-1.02241	-1.37768	-1.70692	-2.00091	-2.28989	-2.59092	-2.89092	-3.19168	-3.48826	-3.76672	-4.01468	-4.2271	-4.41049	-4.56177	-4.6756	-4.74506	-4.76668	-4.73857	-4.65265	-4.49066	-4.22278	-3.78896	-3.10027	-2.0911	-0.901452	45.8096	13.7855	9.07453	1.51914
	D-1	0	-0.165117	0.329039	0.701806	0.927543	0.980979	0.874007	0.66134	0.379372	0.0536597	-0.298221	-0.662466	-1.02611	-1.38138	-1.71102	-2.00511	-2.29329	-2.59352	-2.89312	-3.19338	-3.48966	-3.76752	-4.01488	-4.227	-4.40989	-4.56097	-4.6742	-4.74336	-4.76458	-4.73627	-4.64995	-4.48776	-4.21968	-3.78596	-3.09727	-2.0887	-0.900652	45.7625	13.7578	9.06068	1.51841
	D-5	0	-0.167817	0.322339	0.693906	0.917943	0.967479	0.856407	0.64034	0.355772	0.0279597	-0.325321	-0.690666	-1.05501	-1.41118	-1.74312	-2.03811	-2.32059	-2.61452	-2.91062	-3.20728	-3.50006	-3.77382	-4.01678	-4.2256	-4.40569	-4.55357	-4.6638	-4.72976	-4.74818	-4.71717	-4.62845	-4.46446	-4.19528	-3.76136	-3.07327	-2.0702	-0.893952	45.3957	13.5415	8.95288	1.51253
	D-10	0	-0.171217	0.313939	0.684106	0.905943	0.950379	0.834307	0.61434	0.326372	-0.00374026	-0.358721	-0.725266	-1.09051	-1.44738	-1.78202	-2.07861	-2.35539	-2.64112	-2.93212	-3.22448	-3.51276	-3.78132	-4.01888	-4.2238	-4.40019	-4.54417	-4.6506	-4.71266	-4.72748	-4.69327	-4.60155	-4.43516	-4.16468	-3.73076	-3.04347	-2.0475	-0.885752	44.9433	13.2751	8.82062	1.50501
	D-50	0	-0.197617	0.246839	0.602506	0.801043	0.802179	0.649907	0.40104	0.0909722	-0.25534	-0.621021	-0.993566	-1.36171	-1.71928	-2.06012	-2.37321	-2.64409	-2.87972	-3.11402	-3.36578	-3.61686	-3.84182	-4.04088	-4.2165	-4.36229	-4.47447	-4.5489	-4.58036	-4.56608	-4.50487	-4.38915	-4.20426	-3.92408	-3.49086	-2.81367	-1.8793	-0.828852	41.3134	11.1284	7.79863	1.42697
	D-100	0	-0.229317	0.165639	0.489306	0.642743	0.590579	0.398707	0.12064	-0.210028	-0.56954	-0.941921	-1.31557	-1.68011	-2.03138	-2.36372	-2.67081	-2.94829	-3.18662	-3.38492	-3.57148	-3.75556	-3.92812	-4.08958	-4.2269	-4.33149	-4.40217	-4.4357	-4.42786	-4.37598	-4.27987	-4.13425	-3.92626	-3.63428	-3.20316	-2.55017	-1.7014	-0.773052	36.8242	8.68718	6.58551	1.31914
	D-300	0	-0.321217	-0.134761	-0.0978945	-0.228857	-0.468221	-0.776593	-1.12146	-1.48283	-1.84554	-2.19952	-2.53657	-2.84941	-3.13548	-3.39132	-3.61211	-3.79489	-3.93582	-4.04922	-4.15618	-4.24976	-4.31782	-4.35698	-4.356	-4.30889	-4.21437	-4.0818	-3.91746	-3.71878	-3.48907	-3.22745	-2.92986	-2.58908	-2.19396	-1.73917	-1.2133	-0.615252
	D-500	0	-0.497917	-0.701061	-1.01979	-1.38586	-1.76972	-2.15549	-2.53156	-2.89223	-3.23164	-3.54202	-3.81767	-4.05151	-4.24328	-4.39252	-4.49691	-4.55749	-4.57722	-4.56722	-4.54408	-4.50526	-4.44232	-4.35468	-4.2362	-4.08499	-3.90347	-3.6925	-3.45006	-3.17358	-2.86387	-2.52775	-2.18656	-1.85698	-1.52926	-1.18957	-0.837299	-0.479752
	D-1000	0	-0.497317	-0.620861	-0.748794	-0.877257	-1.00292	-1.12239	-1.23156	-1.32773	-1.40774	-1.46962	-1.51177	-1.53161	-1.53078	-1.50942	-1.46651	-1.40329	-1.32112	-1.23032	-1.14928	-1.07696	-1.00572	-0.935777	-0.861595	-0.78179	-0.699675	-0.616499	-0.532261	-0.450581	-0.379266	-0.323955	-0.289156	-0.280577	-0.289058	-0.297868	-0.301999	-0.301852
	W-0,5	0	-0.163917	0.331939	0.705206	0.931643	0.986779	0.881607	0.67044	0.389672	0.0647597	-0.286321	-0.650166	-1.01351	-1.36828	-1.69692	-1.99071	-2.28149	-2.58452	-2.88542	-3.18738	-3.48506	-3.76472	-4.01388	-4.2276	-4.41169	-4.56407	-4.6788	-4.74916	-4.77168	-4.74447	-4.65915	-4.49786	-4.23028	-3.79646	-3.10777	-2.0968	-0.903552	45.9223	13.853	9.10766	1.52102
	W-1	0	-0.164417	0.330639	0.703906	0.929843	0.984279	0.878407	0.66664	0.385372	0.0600597	-0.291321	-0.655366	-1.01881	-1.37388	-1.70282	-1.99681	-2.28649	-2.58822	-2.88872	-3.18988	-3.48706	-3.76592	-4.01438	-4.2273	-4.41089	-4.56277	-4.6769	-4.74676	-4.76868	-4.74097	-4.65535	-4.49356	-4.22578	-3.79206	-3.10327	-2.0934	-0.902452	45.8546	13.8127	9.08777	1.51992
	W-5	0	-0.168417	0.321039	0.692306	0.915943	0.964679	0.852807	0.63614	0.350972	0.0227597	-0.330821	-0.696166	-1.06091	-1.41718	-1.74962	-2.04471	-2.32629	-2.61882	-2.91412	-3.21008	-3.50216	-3.77512	-4.01708	-4.2254	-4.40469	-4.55207	-4.6616	-4.72706	-4.74478	-4.71327	-4.62415	-4.45966	-4.19018	-3.75646	-3.06837	-2.0665	-0.892652	45.3218	13.4981	8.93117	1.51135
	W-10	0	-0.173217	0.308739	0.678006	0.898443	0.939679	0.820707	0.59824	0.308272	-0.0231403	-0.379321	-0.746366	-1.11201	-1.46938	-1.80542	-2.10321	-2.37709	-2.65792	-2.94532	-3.23488	-3.52056	-3.78582	-4.02008	-4.2227	-4.39669	-4.53827	-4.6422	-4.70216	-4.71458	-4.67837	-4.58485	-4.41696	-4.14578	-3.71186	-3.02517	-2.0335	-0.880952	44.6509	13.0956	8.73828	1.49865
	W-50	0	-0.210917	0.213039	0.558106	0.740443	0.719479	0.550307	0.28914	-0.0297278	-0.38194	-0.750721	-1.12387	-1.49081	-1.84598	-2.18392	-2.49701	-2.77469	-3.00622	-3.21522	-3.43888	-3.66406	-3.86562	-4.04838	-4.2091	-4.33809	-4.43307	-4.4909	-4.50626	-4.47668	-4.40157	-4.27375	-4.07976	-3.79548	-3.36386	-2.69587	-1.798	-0.802952	39.5339	10.1377	7.30505	1.38776
	W-100	0	-0.253617	0.103839	0.388306	0.490743	0.397079	0.177307	-0.11936	-0.460628	-0.82394	-1.19502	-1.56327	-1.91911	-2.25858	-2.57702	-2.86881	-3.13089	-3.36032	-3.55842	-3.72318	-3.86316	-3.99612	-4.11948	-4.2187	-4.28599	-4.32057	-4.3193	-4.27786	-4.19438	-4.06977	-3.90025	-3.67506	-3.37488	-2.94946	-2.33487	-1.5671	-0.730752	32.9883	6.83792	5.56691	1.22832
	W-300	0	-0.393617	-0.428861	-0.636494	-0.923857	-1.25462	-1.60309	-1.95556	-2.30153	-2.63264	-2.94202	-3.22437	-3.47391	-3.68918	-3.86742	-4.00661	-4.10919	-4.17532	-4.21222	-4.23648	-4.24596	-4.23192	-4.19338	-4.1237	-4.02039	-3.88537	-3.7159	-3.50396	-3.24258	-2.94747	-2.63475	-2.30796	-1.98248	-1.65446	-1.30437	-0.924099	-0.513352
	W-500	0	-0.497317	-0.620861	-0.748794	-0.877257	-1.00292	-1.12239	-1.23156	-1.32773	-1.40774	-1.46962	-1.51177	-1.53161	-1.53078	-1.50942	-1.46651	-1.40329	-1.32112	-1.23032	-1.14928	-1.07696	-1.00572	-0.935777	-0.861595	-0.78179	-0.699675	-0.616499	-0.532261	-0.450581	-0.379266	-0.323955	-0.289156	-0.280577	-0.289058	-0.297868	-0.301999	-0.301852
	W-1000	0	-0.497317	-0.620861	-0.748794	-0.877257	-1.00292	-1.12239	-1.23156	-1.32773	-1.40774	-1.46962	-1.51177	-1.53161	-1.53078	-1.50942	-1.46651	-1.40329	-1.32112	-1.23032	-1.14928	-1.07696	-1.00572	-0.935777	-0.861595	-0.78179	-0.699675	-0.616499	-0.532261	-0.450581	-0.379266	-0.323955	-0.289156	-0.280577	-0.289058	-0.297868	-0.301999	-0.301852
	Beaufort 7	Angle of heel (φ)																																					Critical angle of heel φc	Cumulative GZ area up to φc	Cumulative HA area up to φc	DSI
		0°	5°	10°	15°	20°	25°	30°	35°	40°	45°	50°	55°	60°	65°	70°	75°	80°	85°	90°	95°	100°	105°	110°	115°	120°	125°	130°	135°	140°	145°	150°	155°	160°	165°	170°	175°	180°
	Lightship	0	-0.675891	-0.307896	-0.0662045	0.0276128	-0.0471925	-0.275936	-0.599979	-0.980151	-1.38775	-1.80278	-2.21017	-2.59401	-2.94823	-3.25521	-3.50506	-3.72972	-3.94694	-4.15407	-4.37187	-4.59468	-4.80028	-4.97679	-5.11342	-5.21493	-5.28237	-5.31095	-5.29417	-5.23209	-5.13103	-4.98853	-4.79094	-4.51434	-4.08934	-3.40962	-2.40399	-1.2129	21.8456	5.27773	6.31753	0.835411
	D-0,5	0	-0.676291	-0.308596	-0.0673045	0.0264128	-0.0487925	-0.278136	-0.602579	-0.983251	-1.39085	-1.80628	-2.21377	-2.59761	-2.95203	-3.25931	-3.50916	-3.73312	-3.94964	-4.15627	-4.37367	-4.59588	-4.80108	-4.97709	-5.11322	-5.21453	-5.28137	-5.30965	-5.29247	-5.23009	-5.12863	-4.98583	-4.78804	-4.51134	-4.08624	-3.40662	-2.40169	-1.2119	21.756	5.23816	6.28108	0.833959
	D-1	0	-0.676591	-0.309496	-0.0683045	0.0253128	-0.0504925	-0.280336	-0.605279	-0.986151	-1.39415	-1.80968	-2.21727	-2.60131	-2.95573	-3.26341	-3.51336	-3.73652	-3.95224	-4.15847	-4.37537	-4.59728	-4.80188	-4.97729	-5.11312	-5.21393	-5.28057	-5.30825	-5.29077	-5.22799	-5.12633	-4.98313	-4.78514	-4.50824	-4.08324	-3.40362	-2.39929	-1.2111	21.6696	5.19996	6.2459	0.83254
	D-5	0	-0.679291	-0.316196	-0.0762045	0.0157128	-0.0639925	-0.297936	-0.626279	-1.00975	-1.41985	-1.83678	-2.24547	-2.63021	-2.98553	-3.29551	-3.54636	-3.76382	-3.97324	-4.17597	-4.38927	-4.60768	-4.80818	-4.97919	-5.11172	-5.20973	-5.27317	-5.29785	-5.27717	-5.21159	-5.10723	-4.96163	-4.76184	-4.48384	-4.05864	-3.37962	-2.38079	-1.2044	20.9857	4.89904	5.96763	0.820935
	D-10	0	-0.682691	-0.324596	-0.0860045	0.00371277	-0.0810925	-0.320036	-0.652279	-1.03915	-1.45155	-1.87018	-2.28007	-2.66571	-3.02173	-3.33441	-3.58686	-3.79862	-3.99984	-4.19747	-4.40647	-4.62038	-4.81568	-4.98129	-5.10992	-5.20423	-5.26377	-5.28465	-5.26007	-5.19089	-5.08333	-4.93473	-4.73254	-4.45324	-4.02804	-3.34982	-2.35809	-1.1962	20.2189	4.56252	5.65564	0.806719
	D-50	0	-0.709091	-0.391696	-0.167605	-0.101187	-0.229292	-0.504436	-0.865579	-1.27455	-1.70315	-2.13248	-2.54837	-2.93691	-3.29363	-3.61251	-3.88146	-4.08732	-4.23844	-4.37937	-4.54777	-4.72448	-4.87618	-5.00329	-5.10262	-5.16633	-5.19407	-5.18295	-5.12777	-5.02949	-4.89493	-4.72233	-4.50164	-4.21264	-3.78814	-3.12002	-2.18989	-1.1393
	D-100	0	-0.740791	-0.472896	-0.280805	-0.259487	-0.440892	-0.755636	-1.14598	-1.57555	-2.01735	-2.45338	-2.87037	-3.25531	-3.60573	-3.91611	-4.17906	-4.39152	-4.54534	-4.65027	-4.75347	-4.86318	-4.96248	-5.05199	-5.11302	-5.13553	-5.12177	-5.06975	-4.97527	-4.83939	-4.66993	-4.46743	-4.22364	-3.92284	-3.50044	-2.85652	-2.01199	-1.0835
	D-300	0	-0.832691	-0.773296	-0.868005	-1.13109	-1.49969	-1.93094	-2.38808	-2.84835	-3.29335	-3.71098	-4.09137	-4.42461	-4.70983	-4.94371	-5.12036	-5.23812	-5.29454	-5.31457	-5.33817	-5.35738	-5.35218	-5.31939	-5.24212	-5.11293	-4.93397	-4.71585	-4.46487	-4.18219	-3.87913	-3.56063	-3.22724	-2.87764	-2.49124	-2.04552	-1.52389	-0.925698
	D-500	0	-1.00939	-1.3396	-1.7899	-2.28809	-2.80119	-3.30984	-3.79818	-4.25775	-4.67945	-5.05348	-5.37247	-5.62671	-5.81763	-5.94491	-6.00516	-6.00072	-5.93594	-5.83257	-5.72607	-5.61288	-5.47668	-5.31709	-5.12232	-4.88903	-4.62307	-4.32655	-3.99747	-3.63699	-3.25393	-2.86093	-2.48394	-2.14554	-1.82654	-1.49592	-1.14789	-0.790198
	D-1000	0	-1.00879	-1.2594	-1.5189	-1.77949	-2.03439	-2.27674	-2.49818	-2.69325	-2.85555	-2.98108	-3.06657	-3.10681	-3.10513	-3.06181	-2.97476	-2.84652	-2.67984	-2.49567	-2.33127	-2.18458	-2.04008	-1.89819	-1.74772	-1.58583	-1.41927	-1.25055	-1.07967	-0.913989	-0.769328	-0.657132	-0.586543	-0.56914	-0.586344	-0.604216	-0.612594	-0.612298
	W-0,5	0	-0.675391	-0.306596	-0.0649045	0.0294128	-0.0446925	-0.272736	-0.596179	-0.975851	-1.38305	-1.79778	-2.20497	-2.58871	-2.94263	-3.24931	-3.49896	-3.72472	-3.94324	-4.15077	-4.36937	-4.59268	-4.79908	-4.97629	-5.11372	-5.21573	-5.28367	-5.31285	-5.29657	-5.23509	-5.13453	-4.99233	-4.79524	-4.51884	-4.09374	-3.41412	-2.40739	-1.214	21.9845	5.33882	6.37404	0.837589
	W-1	0	-0.675891	-0.307896	-0.0662045	0.0276128	-0.0471925	-0.275936	-0.599979	-0.980151	-1.38775	-1.80278	-2.21017	-2.59401	-2.94823	-3.25521	-3.50506	-3.72972	-3.94694	-4.15407	-4.37187	-4.59468	-4.80028	-4.97679	-5.11342	-5.21493	-5.28237	-5.31095	-5.29417	-5.23209	-5.13103	-4.98853	-4.79094	-4.51434	-4.08934	-3.40962	-2.40399	-1.2129	21.8456	5.27773	6.31753	0.835411
	W-5	0	-0.679891	-0.317496	-0.0778045	0.0137128	-0.0667925	-0.301536	-0.630479	-1.01455	-1.42505	-1.84228	-2.25097	-2.63611	-2.99153	-3.30201	-3.55296	-3.76952	-3.97754	-4.17947	-4.39207	-4.60978	-4.80948	-4.97949	-5.11152	-5.20873	-5.27167	-5.29565	-5.27447	-5.20819	-5.10333	-4.95733	-4.75704	-4.47874	-4.05374	-3.37472	-2.37709	-1.2031	20.8517	4.84025	5.9131	0.818563
	W-10	0	-0.684691	-0.329796	-0.0921045	-0.00378723	-0.0917925	-0.333636	-0.668379	-1.05725	-1.47095	-1.89078	-2.30117	-2.68721	-3.04373	-3.35781	-3.61146	-3.82032	-4.01664	-4.21067	-4.41687	-4.62818	-4.82018	-4.98249	-5.10882	-5.20073	-5.25787	-5.27625	-5.24957	-5.17799	-5.06843	-4.91803	-4.71434	-4.43434	-4.00914	-3.33152	-2.34409	-1.1914
	W-50	0	-0.722391	-0.425496	-0.212005	-0.161787	-0.311992	-0.604036	-0.977479	-1.39525	-1.82975	-2.26218	-2.67867	-3.06601	-3.42033	-3.73631	-4.00526	-4.21792	-4.36494	-4.48057	-4.62087	-4.77168	-4.89998	-5.01079	-5.09522	-5.14213	-5.15267	-5.12495	-5.05367	-4.94009	-4.79163	-4.60693	-4.37714	-4.08404	-3.66114	-3.00222	-2.10859	-1.1134
	W-100	0	-0.765091	-0.534696	-0.381805	-0.411487	-0.634392	-0.977036	-1.38598	-1.82615	-2.27175	-2.70648	-3.11807	-3.49431	-3.83293	-4.12941	-4.37706	-4.57412	-4.71904	-4.82377	-4.90517	-4.97078	-5.03048	-5.08189	-5.10482	-5.09003	-5.04017	-4.95335	-4.82527	-4.65779	-4.45983	-4.23343	-3.97244	-3.66344	-3.24674	-2.64122	-1.87769	-1.0412
	W-300	0	-0.905091	-1.0674	-1.4066	-1.82609	-2.28609	-2.75744	-3.22218	-3.66705	-4.08045	-4.45348	-4.77917	-5.04911	-5.26353	-5.41981	-5.51486	-5.55242	-5.53404	-5.47757	-5.41847	-5.35358	-5.26628	-5.15579	-5.00982	-4.82443	-4.60497	-4.34995	-4.05137	-3.70599	-3.33753	-2.96793	-2.60534	-2.27104	-1.95174	-1.61072	-1.23469	-0.823798
	W-500	0	-1.00879	-1.2594	-1.5189	-1.77949	-2.03439	-2.27674	-2.49818	-2.69325	-2.85555	-2.98108	-3.06657	-3.10681	-3.10513	-3.06181	-2.97476	-2.84652	-2.67984	-2.49567	-2.33127	-2.18458	-2.04008	-1.89819	-1.74772	-1.58583	-1.41927	-1.25055	-1.07967	-0.913989	-0.769328	-0.657132	-0.586543	-0.56914	-0.586344	-0.604216	-0.612594	-0.612298
	W-1000	0	-1.00879	-1.2594	-1.5189	-1.77949	-2.03439	-2.27674	-2.49818	-2.69325	-2.85555	-2.98108	-3.06657	-3.10681	-3.10513	-3.06181	-2.97476	-2.84652	-2.67984	-2.49567	-2.33127	-2.18458	-2.04008	-1.89819	-1.74772	-1.58583	-1.41927	-1.25055	-1.07967	-0.913989	-0.769328	-0.657132	-0.586543	-0.56914	-0.586344	-0.604216	-0.612594	-0.612298

## Sheet: LAS outputs - SPV
	Maxsurf LAS stability outputs and post-processing for a SPV
	Righting arm GZ [m]
	Test ID	Angle of heel (φ)
		0°	5°	10°	15°	20°	25°	30°	35°	40°	45°	50°	55°	60°	65°	70°	75°	80°	85°	90°	95°	100°	105°	110°	115°	120°	125°	130°	135°	140°	145°	150°	155°	160°	165°	170°	175°	180°
	Lightship	0	0.228	0.463	0.655	0.843	0.958	1.014	1.026	1.004	0.958	0.895	0.819	0.733	0.638	0.536	0.426	0.312	0.194	0.075	-0.045	-0.166	-0.286	-0.403	-0.514	-0.617	-0.71	-0.79	-0.852	-0.893	-0.909	-0.9	-0.867	-0.797	-0.676	-0.477	-0.218	0.033
	D-0,5	0	0.227	0.462	0.654	0.841	0.956	1.013	1.024	1.002	0.957	0.893	0.817	0.731	0.637	0.534	0.425	0.31	0.193	0.073	-0.047	-0.168	-0.287	-0.404	-0.515	-0.618	-0.711	-0.79	-0.853	-0.894	-0.909	-0.9	-0.867	-0.797	-0.676	-0.477	-0.218	0.033
	D-1	0	0.227	0.461	0.653	0.84	0.955	1.012	1.023	1.001	0.955	0.892	0.816	0.73	0.635	0.532	0.423	0.309	0.191	0.072	-0.048	-0.169	-0.289	-0.405	-0.516	-0.619	-0.712	-0.791	-0.853	-0.894	-0.909	-0.901	-0.867	-0.797	-0.675	-0.476	-0.218	0.033
	D-5	0	0.224	0.447	0.646	0.831	0.946	1.002	1.012	0.989	0.943	0.879	0.803	0.716	0.621	0.519	0.409	0.295	0.178	0.059	-0.06	-0.18	-0.299	-0.414	-0.524	-0.626	-0.718	-0.797	-0.858	-0.898	-0.912	-0.902	-0.867	-0.795	-0.672	-0.472	-0.216	0.032
	D-10	0	0.221	0.437	0.636	0.82	0.934	0.989	0.999	0.975	0.928	0.864	0.787	0.7	0.604	0.502	0.393	0.279	0.162	0.043	-0.075	-0.194	-0.312	-0.426	-0.535	-0.636	-0.726	-0.804	-0.864	-0.903	-0.916	-0.905	-0.868	-0.793	-0.668	-0.467	-0.213	0.032
	D-50	0	0.196	0.374	0.567	0.732	0.845	0.893	0.896	0.867	0.817	0.75	0.67	0.579	0.481	0.377	0.269	0.157	0.043	-0.071	-0.185	-0.296	-0.405	-0.509	-0.609	-0.701	-0.783	-0.851	-0.903	-0.935	-0.939	-0.918	-0.866	-0.776	-0.638	-0.432	-0.197	0.028
	D-100	0	0.166	0.328	0.489	0.633	0.739	0.78	0.776	0.744	0.69	0.62	0.537	0.445	0.346	0.243	0.136	0.027	-0.081	-0.19	-0.298	-0.402	-0.503	-0.597	-0.685	-0.766	-0.836	-0.895	-0.938	-0.962	-0.957	-0.924	-0.857	-0.753	-0.602	-0.396	-0.183	0.026
	D-300	0.001	0.096	0.173	0.251	0.317	0.361	0.373	0.352	0.306	0.244	0.17	0.089	0.003	-0.086	-0.176	-0.266	-0.355	-0.443	-0.527	-0.608	-0.684	-0.754	-0.818	-0.874	-0.92	-0.956	-0.98	-0.99	-0.981	-0.95	-0.894	-0.802	-0.669	-0.503	-0.33	-0.156	0.018
	D-500	-0.007	0.028	0.058	0.073	0.067	0.045	0.01	-0.037	-0.097	-0.165	-0.237	-0.312	-0.386	-0.459	-0.53	-0.597	-0.661	-0.72	-0.775	-0.824	-0.868	-0.906	-0.937	-0.96	-0.975	-0.981	-0.976	-0.958	-0.926	-0.877	-0.807	-0.713	-0.592	-0.45	-0.298	-0.143	0.014
	D-1000	-0.009	0	0	0	0	0	0	0	0	0	0	0	0	0	0	0	0	0	0	0	0	0	0	0	0	0	0	0	0	0	0	0	0	0	0	0	0
	W-0,5	0	0.227	0.462	0.654	0.841	0.956	1.013	1.024	1.002	0.956	0.893	0.816	0.73	0.636	0.533	0.424	0.31	0.192	0.073	-0.048	-0.168	-0.288	-0.404	-0.515	-0.618	-0.711	-0.791	-0.853	-0.894	-0.909	-0.9	-0.867	-0.797	-0.676	-0.476	-0.218	0.033
	W-1	0	0.225	0.447	0.647	0.833	0.948	1.004	1.014	0.991	0.945	0.882	0.805	0.719	0.624	0.521	0.412	0.298	0.18	0.061	-0.058	-0.178	-0.297	-0.413	-0.523	-0.625	-0.717	-0.796	-0.857	-0.898	-0.912	-0.902	-0.867	-0.796	-0.673	-0.473	-0.216	0.032
	W-5	0	0.223	0.441	0.641	0.826	0.941	0.996	1.006	0.983	0.936	0.873	0.796	0.709	0.614	0.511	0.402	0.288	0.17	0.052	-0.067	-0.186	-0.305	-0.42	-0.529	-0.631	-0.722	-0.8	-0.861	-0.901	-0.914	-0.903	-0.867	-0.794	-0.671	-0.47	-0.215	0.032
	W-10	0	0.218	0.414	0.628	0.809	0.924	0.978	0.987	0.963	0.915	0.851	0.773	0.685	0.59	0.487	0.378	0.264	0.147	0.029	-0.089	-0.206	-0.323	-0.436	-0.544	-0.644	-0.733	-0.81	-0.869	-0.907	-0.919	-0.906	-0.868	-0.792	-0.665	-0.463	-0.211	0.031
	W-50	0	0.183	0.352	0.531	0.686	0.797	0.842	0.841	0.81	0.759	0.69	0.609	0.517	0.419	0.314	0.207	0.097	-0.015	-0.127	-0.238	-0.346	-0.45	-0.55	-0.644	-0.731	-0.808	-0.872	-0.92	-0.948	-0.948	-0.921	-0.862	-0.765	-0.621	-0.414	-0.19	0.027
	W-100	0	0.148	0.292	0.427	0.554	0.649	0.685	0.678	0.642	0.585	0.514	0.43	0.339	0.241	0.14	0.036	-0.069	-0.174	-0.278	-0.379	-0.477	-0.57	-0.658	-0.737	-0.808	-0.87	-0.92	-0.956	-0.972	-0.961	-0.92	-0.844	-0.731	-0.571	-0.371	-0.174	0.024
	W-300	0.001	0.05	0.098	0.137	0.157	0.158	0.141	0.106	0.055	-0.007	-0.077	-0.152	-0.23	-0.308	-0.385	-0.46	-0.532	-0.601	-0.666	-0.726	-0.781	-0.83	-0.873	-0.908	-0.935	-0.952	-0.958	-0.951	-0.929	-0.886	-0.822	-0.729	-0.606	-0.458	-0.304	-0.145	0.016
	W-500	-0.012	0	0	0	0	0	0	0	0	0	0	0	0	0	0	0	0	0	0	0	0	0	0	0	0	0	0	0	0	0	0	0	0	0	0	0	0
	W-1000	-0.009	0	0	0	0	0	0	0	0	0	0	0	0	0	0	0	0	0	0	0	0	0	0	0	0	0	0	0	0	0	0	0	0	0	0	0	0
	Cumulative area under the righting arm GZ [m.deg]
	Test ID	Angle of heel (φ)
		0°	5°	10°	15°	20°	25°	30°	35°	40°	45°	50°	55°	60°	65°	70°	75°	80°	85°	90°	95°	100°	105°	110°	115°	120°	125°	130°	135°	140°	145°	150°	155°	160°	165°	170°	175°	180°
	Lightship	0	0.5629	2.2989	5.1015	8.8595	13.3916	18.3413	23.458	28.5428	33.4558	38.0946	42.3832	46.266	49.6973	52.6357	55.0438	56.8923	58.1593	58.8326	58.9072	58.3787	57.2472	55.523	53.2289	50.3983	47.0762	43.3211	39.2085	34.8345	30.3187	25.7873	21.3575	17.18	13.4695	10.5531	8.8052	8.3481
	D-0,5	0	0.5621	2.2954	5.0939	8.8466	13.3728	18.3166	23.4268	28.5046	33.4103	38.0414	42.3222	46.1968	49.6196	52.5494	54.9489	56.7888	58.0475	58.7126	58.7793	58.2435	57.1052	55.3749	53.0752	50.2396	46.913	43.154	39.038	34.6612	30.1432	25.6103	21.1797	17.0026	13.2936	10.3795	8.6336	8.1769
	D-1	0	0.5612	2.2919	5.0864	8.8337	13.3541	18.2919	23.3955	28.4664	33.3647	37.9883	42.2612	46.1277	49.5421	52.4632	54.8541	56.6856	57.9359	58.5928	58.6517	58.1085	56.9636	55.2272	52.9219	50.0812	46.7502	42.9872	38.8679	34.4883	29.9682	25.4337	21.0025	16.8257	13.1181	10.2063	8.4625	8.0063
	D-5	0	0.5591	2.2429	4.979	8.6878	13.1605	18.0504	23.1019	28.1171	32.9569	37.5196	41.73	45.5314	48.8781	51.7306	54.0529	55.8165	57.0002	57.5919	57.588	56.9864	55.7878	54.0023	51.6525	48.7717	45.4051	41.611	37.4651	33.0633	28.5257	23.979	19.5421	15.3682	11.6721	8.7785	7.0505	6.5982
	D-10	0	0.5522	2.2022	4.8902	8.5479	12.9625	17.7931	22.78	27.7265	32.4941	36.9822	41.1158	44.8375	48.1015	50.8699	53.1082	54.7886	55.891	56.4032	56.3228	55.6495	54.3852	52.5401	50.1363	47.207	43.7973	39.9659	35.7882	31.36	26.8015	22.2404	17.7973	13.6278	9.9461	7.0753	5.3667	4.9191
	D-50	0	0.4971	1.9206	4.2721	7.5376	11.5049	15.8742	20.3621	24.78	28.9976	32.9207	36.4746	39.5996	42.2511	44.3962	46.0114	47.0774	47.5796	47.511	46.8706	45.6663	43.9127	41.6256	38.8272	35.5492	31.8356	27.7446	23.351	18.7455	14.0482	9.3944	4.9213	0.8006	-2.7599	-5.4569	-7.029	-7.4462
	D-100	0	0.4178	1.6546	3.6998	6.5159	9.9694	13.7913	17.6961	21.5057	25.0972	28.3771	31.2733	33.7322	35.7131	37.1868	38.1336	38.5417	38.4066	37.7268	36.5058	34.7545	32.4901	29.738	26.5297	22.8994	18.8899	14.5569	9.9696	5.2114	0.403	-4.3127	-8.782	-12.8242	-16.2352	-18.7435	-20.1889	-20.5821
	D-300	0	0.2493	0.9262	1.9856	3.4133	5.1208	6.9688	8.7934	10.4477	11.828	12.8659	13.5156	13.7469	13.5406	12.8863	11.7807	10.2262	8.2301	5.8045	2.9658	-0.2648	-3.8616	-7.7946	-12.0269	-16.5155	-21.2109	-26.057	-30.9891	-35.9247	-40.7615	-45.3841	-49.6403	-53.3336	-56.2719	-58.3552	-59.5701	-59.9141
	D-500	0	0.0531	0.2728	0.6096	0.9672	1.2522	1.3962	1.334	1.0027	0.3506	-0.6546	-2.0266	-3.771	-5.884	-8.356	-11.1739	-14.3193	-17.7725	-21.5119	-25.5125	-29.7473	-34.1868	-38.7978	-43.5443	-48.387	-53.2808	-58.1759	-63.0154	-67.7329	-72.2486	-76.4663	-80.2756	-83.5489	-86.1619	-88.0363	-89.1397	-89.4604
	D-1000	0	0	0	0	0	0	0	0	0	0	0	0	0	0	0	0	0	0	0	0	0	0	0	0	0	0	0	0	0	0	0	0	0	0	0	0	0
	W-0,5	0	0.5617	2.2938	5.0905	8.8407	13.3643	18.3054	23.4126	28.4872	33.3896	38.0172	42.2945	46.1654	49.5844	52.5102	54.9058	56.7419	57.9967	58.6581	58.7212	58.1821	57.0408	55.3077	53.0055	50.1676	46.8389	43.0781	38.9606	34.5826	30.0636	25.53	21.0991	16.9221	13.2138	10.3007	8.5558	8.0993
	W-1	0	0.5604	2.2477	4.9896	8.7059	13.187	18.0856	23.1464	28.1717	33.022	37.5957	41.8174	45.6305	48.9895	51.8544	54.1891	55.965	57.1608	57.7643	57.7719	57.1809	55.9921	54.2157	51.874	49.0006	45.6406	41.8523	37.7113	33.3138	28.7794	24.2351	19.7993	15.6252	11.9272	9.0305	7.2998	6.8468
	W-5	0	0.5568	2.2206	4.9302	8.6164	13.0625	17.9254	22.9474	27.9313	32.7381	37.2667	41.442	45.2069	48.5159	51.3299	53.6138	55.3394	56.4859	57.0412	57.0023	56.3679	55.1393	53.3264	50.9517	48.0487	44.6624	40.8511	36.6906	32.2767	27.7294	23.176	18.7362	14.5642	10.8746	7.9915	6.2723	5.8221
	W-10	0	0.5539	2.1314	4.7346	8.3526	12.7132	17.4908	22.4195	27.3042	32.0071	36.4284	40.4934	44.1439	47.3342	50.0277	52.1911	53.7976	54.8276	55.2693	55.1208	54.3837	53.0608	51.1626	48.7108	45.7387	42.2913	38.4272	34.2218	29.7707	25.1941	20.6206	16.1727	12.0077	8.3393	5.4891	3.7978	3.3544
	W-50	0	0.4644	1.803	4.0105	7.0671	10.798	14.9182	19.1398	23.2788	27.2093	30.8381	34.0907	36.9096	39.2518	41.0859	42.3903	43.1509	43.357	43.0032	42.0919	40.6309	38.6373	36.1337	33.145	29.703	25.8507	21.6455	17.1604	12.4821	7.7309	3.0459	-1.4274	-5.5114	-9.0009	-11.6061	-13.1144	-13.5193
	W-100	0	0.3698	1.4716	3.2702	5.7293	8.7581	12.1142	15.5334	18.8424	21.9186	24.6714	27.0349	28.9608	30.4137	31.368	31.8071	31.7227	31.1125	29.9808	28.3382	26.1985	23.5802	20.509	17.0182	13.1499	8.9501	4.4702	-0.226	-5.0569	-9.9028	-14.6198	-19.0456	-23.0011	-26.2777	-28.6393	-29.998	-30.3746
	W-300	0	0.1249	0.4962	1.0914	1.8355	2.6312	3.3865	4.0102	4.4176	4.5414	4.3335	3.7623	2.8088	1.4655	-0.2659	-2.3777	-4.8582	-7.6921	-10.8611	-14.3433	-18.1144	-22.1465	-26.408	-30.8638	-35.4745	-40.1954	-44.975	-49.754	-54.4614	-59.0074	-63.2866	-67.1767	-70.5272	-73.1928	-75.0986	-76.2219	-76.5464
	W-500	0	0	0	0	0	0	0	0	0	0	0	0	0	0	0	0	0	0	0	0	0	0	0	0	0	0	0	0	0	0	0	0	0	0	0	0	0
	W-1000	0	0	0	0	0	0	0	0	0	0	0	0	0	0	0	0	0	0	0	0	0	0	0	0	0	0	0	0	0	0	0	0	0	0	0	0	0
	Heeling arm HA [m]
		Angle of heel (φ)
		0°	5°	10°	15°	20°	25°	30°	35°	40°	45°	50°	55°	60°	65°	70°	75°	80°	85°	90°	95°	100°	105°	110°	115°	120°	125°	130°	135°	140°	145°	150°	155°	160°	165°	170°	175°	180°
	Beaufort 3	0.046557	0.0570261	0.0678417	0.0809611	0.0927623	0.104197	0.114729	0.124095	0.131838	0.137676	0.141515	0.143228	0.142754	0.140437	0.135914	0.129537	0.121185	0.111372	0.102277	0.0934215	0.0850009	0.0791775	0.0745812	0.070518	0.066541	0.0621818	0.0572491	0.0516042	0.0456893	0.0401344	0.0348852	0.0290744	0.0231672	0.0174327	0.0120024	0.00734777	0.0046613
	Beaufort 5	0.114967	0.14082	0.167527	0.199924	0.229066	0.257302	0.28331	0.306439	0.32556	0.339974	0.349454	0.353686	0.352515	0.346793	0.335625	0.319877	0.299253	0.275022	0.252561	0.230694	0.2099	0.19552	0.18417	0.174136	0.164316	0.153551	0.14137	0.127431	0.112825	0.0991075	0.0861452	0.071796	0.0572089	0.0430482	0.0296385	0.0181445	0.0115105
	Beaufort 7	0.233207	0.285648	0.339824	0.40554	0.464653	0.521929	0.574685	0.621602	0.660388	0.689626	0.708856	0.71744	0.715065	0.703458	0.680804	0.64886	0.607024	0.557872	0.512312	0.467955	0.425775	0.396606	0.373582	0.35323	0.333309	0.311473	0.286765	0.258489	0.228861	0.201036	0.174743	0.145636	0.116046	0.0873218	0.0601208	0.0368055	0.0233488
	Cumulative area under the heeling arm HA [m.deg]
	Test ID	Angle of heel (φ)
		0°	5°	10°	15°	20°	25°	30°	35°	40°	45°	50°	55°	60°	65°	70°	75°	80°	85°	90°	95°	100°	105°	110°	115°	120°	125°	130°	135°	140°	145°	150°	155°	160°	165°	170°	175°	180°
	Beaufort 3	0	0.258958	0.571127	0.943134	1.37744	1.86984	2.41715	3.01421	3.65405	4.32783	5.02581	5.73767	6.45262	7.1606	7.85148	8.5151	9.14191	9.7233	10.2574	10.7467	11.1927	11.6032	11.9876	12.3503	12.693	13.0148	13.3133	13.5855	13.8287	14.0433	14.2308	14.3907	14.5213	14.6228	14.6964	14.7448	14.7748
	Beaufort 5	0	0.639467	1.41033	2.32896	3.40144	4.61736	5.96889	7.44327	9.02326	10.6871	12.4107	14.1685	15.934	17.6823	19.3883	21.0271	22.5749	24.0106	25.3296	26.5377	27.6392	28.6527	29.602	30.4977	31.3439	32.1385	32.8758	33.5478	34.1485	34.6783	35.1414	35.5363	35.8588	36.1094	36.2911	36.4106	36.4847
	Beaufort 7	0	1.29714	2.86082	4.72423	6.89971	9.36616	12.1077	15.0984	18.3034	21.6784	25.1746	28.7404	32.3216	35.8679	39.3286	42.6528	45.7925	48.7047	51.3802	53.8308	56.0652	58.1211	60.0466	61.8636	63.58	65.1919	66.6875	68.0506	69.269	70.3438	71.2832	72.0841	72.7384	73.2468	73.6154	73.8577	74.0081
	Discrete area under GZ and HA differences for critical heel and DSI computation
	Beaufort 3	Angle of heel (φ)																																					Critical angle of heel φc	Cumulative GZ area up to φc	Cumulative HA area up to φc	DSI
		0°	5°	10°	15°	20°	25°	30°	35°	40°	45°	50°	55°	60°	65°	70°	75°	80°	85°	90°	95°	100°	105°	110°	115°	120°	125°	130°	135°	140°	145°	150°	155°	160°	165°	170°	175°	180°
	Lightship	0	0.303942	1.42383	2.43059	3.32369	4.0397	4.40239	4.51964	4.44497	4.23921	3.94082	3.57674	3.16784	2.72332	2.24752	1.74447	1.22169	0.685607	0.139177	-0.414646	-0.974556	-1.54195	-2.1086	-2.65685	-3.17325	-3.64391	-4.05368	-4.38473	-4.61723	-4.73036	-4.71895	-4.5897	-4.3081	-3.812	-2.98999	-1.79628	-0.487123	91.2565	58.8513	10.3804	5.66948
	D-0,5	0	0.303142	1.42113	2.42649	3.31839	4.0338	4.39649	4.51314	4.43797	4.23191	3.93312	3.56894	3.15964	2.71482	2.23892	1.73587	1.21309	0.677307	0.130977	-0.422546	-0.981856	-1.54875	-2.1147	-2.66245	-3.17825	-3.64841	-4.05758	-4.38813	-4.62003	-4.73256	-4.72045	-4.5905	-4.3077	-3.8105	-2.98769	-1.79428	-0.486723	91.1831	58.7284	10.3732	5.66155
	D-1	0	0.302242	1.41853	2.42249	3.31299	4.028	4.39049	4.50654	4.43107	4.22451	3.92562	3.56104	3.15154	2.70642	2.23022	1.72727	1.20469	0.668907	0.122777	-0.430346	-0.989256	-1.55535	-2.1208	-2.66805	-3.18335	-3.65281	-4.06158	-4.39143	-4.62283	-4.73466	-4.72205	-4.5911	-4.3074	-3.8091	-2.98539	-1.79218	-0.486223	91.1099	58.6059	10.366	5.65365
	D-5	0	0.300142	1.37163	2.36409	3.27449	3.9803	4.34259	4.45444	4.37537	4.16601	3.86472	3.49854	3.08644	2.63872	2.16162	1.65867	1.13679	0.602307	0.0575771	-0.493146	-1.04766	-1.60905	-2.1699	-2.71255	-3.22345	-3.68841	-4.09268	-4.41803	-4.64503	-4.75216	-4.73425	-4.5968	-4.3045	-3.7976	-2.96719	-1.77638	-0.482323	90.5227	57.5915	10.3086	5.58676
	D-10	0	0.293242	1.33783	2.31599	3.22339	3.9222	4.28329	4.38984	4.30667	4.09381	3.79012	3.42174	3.00674	2.55602	2.07752	1.57467	1.05359	0.521007	-0.0219229	-0.569646	-1.11936	-1.67475	-2.2295	-2.76655	-3.27195	-3.73151	-4.12998	-4.44983	-4.67143	-4.77306	-4.74865	-4.603	-4.3001	-3.7832	-2.94439	-1.75698	-0.477623	89.7981	56.3825	10.2359	5.50833
	D-50	0	0.238142	1.11133	1.97949	2.83119	3.4749	3.82199	3.89084	3.77807	3.54381	3.22512	2.84204	2.41004	1.94352	1.45422	0.951572	0.439195	-0.0791932	-0.602723	-1.12965	-1.65036	-2.16405	-2.6715	-3.16115	-3.62065	-4.03541	-4.38958	-4.66573	-4.84873	-4.91186	-4.84135	-4.633	-4.2513	-3.662	-2.77059	-1.62048	-0.447223	84.2362	47.5029	9.63448	4.93051
	D-100	0	0.158842	0.924631	1.67319	2.38179	2.9611	3.27459	3.30774	3.16977	2.91771	2.58192	2.18434	1.74394	1.27292	0.782822	0.283172	-0.218705	-0.716493	-1.21392	-1.71025	-2.19736	-2.67485	-3.1365	-3.57105	-3.97295	-4.33131	-4.63158	-4.85943	-5.00143	-5.02296	-4.90325	-4.6292	-4.1728	-3.5125	-2.58189	-1.49378	-0.423223	77.8211	38.4655	8.86876	4.33719
	D-300	0	-0.00965777	0.364731	0.687393	0.993392	1.2151	1.30069	1.22754	1.01447	0.706515	0.339925	-0.0621568	-0.483655	-0.914277	-1.34518	-1.76923	-2.18131	-2.57749	-2.95972	-3.32795	-3.67666	-4.00725	-4.3174	-4.59505	-4.83125	-5.01721	-5.14468	-5.20423	-5.17883	-5.05136	-4.81015	-4.4161	-3.8239	-3.0398	-2.15689	-1.26328	-0.374023	54.2271	13.4152	5.62762	2.38381
	D-500	0	-0.205858	-0.0924695	-0.0352069	-0.0767084	-0.207398	-0.403314	-0.65926	-0.971134	-1.32589	-1.70318	-2.08386	-2.45936	-2.82098	-3.16288	-3.48153	-3.77221	-4.03459	-4.27352	-4.48985	-4.68086	-4.84995	-4.9954	-5.10925	-5.18535	-5.21561	-5.19368	-5.11163	-4.96073	-4.73026	-4.40525	-3.9692	-3.4039	-2.7145	-1.94799	-1.15178	-0.350723
	D-1000	0	-0.258958	-0.312169	-0.372007	-0.434308	-0.492398	-0.547314	-0.59706	-0.639834	-0.673785	-0.697975	-0.711857	-0.714955	-0.707977	-0.690878	-0.663628	-0.626805	-0.581393	-0.534123	-0.489246	-0.446056	-0.410446	-0.384397	-0.362748	-0.342648	-0.321807	-0.298577	-0.272133	-0.243234	-0.214559	-0.187549	-0.159899	-0.130604	-0.1015	-0.0735878	-0.0483754	-0.0300227
	W-0,5	0	0.302742	1.41993	2.42469	3.31589	4.0312	4.39379	4.51014	4.43477	4.22861	3.92962	3.56544	3.15594	2.71102	2.23492	1.73197	1.20929	0.673407	0.127277	-0.426146	-0.985156	-1.55175	-2.1175	-2.66495	-3.18055	-3.65051	-4.05938	-4.38963	-4.62123	-4.73356	-4.72115	-4.5908	-4.3076	-3.8098	-2.98669	-1.79328	-0.486523	91.1499	58.6726	10.3699	5.65795
	W-1	0	0.301442	1.37513	2.36989	3.28199	3.9887	4.35129	4.46374	4.38547	4.17651	3.87572	3.50984	3.09814	2.65102	2.17402	1.67107	1.14909	0.614407	0.0693771	-0.481646	-1.03706	-1.59925	-2.1608	-2.70445	-3.21605	-3.68181	-4.08688	-4.41313	-4.64073	-4.74896	-4.73185	-4.5957	-4.3047	-3.7995	-2.97029	-1.77908	-0.483023	90.6295	57.7653	10.319	5.59794
	W-5	0	0.297842	1.35163	2.33759	3.25189	3.9537	4.31559	4.42494	4.34407	4.13301	3.83062	3.46344	3.04994	2.60102	2.12312	1.62027	1.09879	0.565107	0.0211771	-0.528146	-1.08046	-1.63905	-2.1973	-2.73745	-3.24565	-3.70811	-4.10988	-4.43263	-4.65713	-4.76186	-4.74095	-4.5997	-4.3026	-3.7911	-2.95669	-1.76758	-0.480223	90.1928	57.0397	10.2763	5.55061
	W-10	0	0.294942	1.26533	2.23119	3.18369	3.8682	4.23029	4.33164	4.24487	4.02911	3.72332	3.35314	2.93554	2.48232	2.00262	1.49977	0.979695	0.448607	-0.0924229	-0.637746	-1.18316	-1.73335	-2.2826	-2.81455	-3.31475	-3.76921	-4.16268	-4.47753	-4.69433	-4.79116	-4.76105	-4.6078	-4.2956	-3.7699	-2.92379	-1.73968	-0.473423	89.1459	55.1938	10.1662	5.42916
	W-50	0	0.205442	1.02643	1.83549	2.62229	3.2385	3.57289	3.62454	3.49917	3.25671	2.93082	2.54074	2.10394	1.63422	1.14322	0.640772	0.133795	-0.375293	-0.887923	-1.40055	-1.90706	-2.40405	-2.888	-3.35145	-3.78465	-4.17411	-4.50378	-4.75723	-4.92153	-4.96576	-4.87255	-4.6332	-4.2146	-3.591	-2.67879	-1.55668	-0.434923	81.3141	43.2051	9.29471	4.64835
	W-100	0	0.110842	0.789631	1.42659	2.02479	2.5364	2.80879	2.82214	2.66917	2.40241	2.05482	1.65164	1.21094	0.744923	0.263422	-0.224528	-0.711205	-1.19159	-1.66582	-2.13185	-2.58576	-3.02875	-3.4556	-3.85355	-4.21095	-4.52161	-4.77848	-4.96833	-5.07413	-5.06046	-4.90455	-4.5857	-4.0861	-3.3781	-2.43519	-1.40708	-0.406623	72.6993	31.1309	8.20974	3.79195
	W-300	0	-0.134058	0.0591305	0.223193	0.309792	0.303302	0.207986	0.0266396	-0.232434	-0.549985	-0.905875	-1.28306	-1.66846	-2.05128	-2.42228	-2.77543	-3.10731	-3.41529	-3.70312	-3.97145	-4.21716	-4.44255	-4.6459	-4.81855	-4.95335	-5.04271	-5.07818	-5.05113	-4.95063	-4.76056	-4.46675	-4.05	-3.4811	-2.7671	-1.97939	-1.17168	-0.354523	35.5141	4.05209	3.08001	1.31561
	W-500	0	-0.258958	-0.312169	-0.372007	-0.434308	-0.492398	-0.547314	-0.59706	-0.639834	-0.673785	-0.697975	-0.711857	-0.714955	-0.707977	-0.690878	-0.663628	-0.626805	-0.581393	-0.534123	-0.489246	-0.446056	-0.410446	-0.384397	-0.362748	-0.342648	-0.321807	-0.298577	-0.272133	-0.243234	-0.214559	-0.187549	-0.159899	-0.130604	-0.1015	-0.0735878	-0.0483754	-0.0300227
	W-1000	0	-0.258958	-0.312169	-0.372007	-0.434308	-0.492398	-0.547314	-0.59706	-0.639834	-0.673785	-0.697975	-0.711857	-0.714955	-0.707977	-0.690878	-0.663628	-0.626805	-0.581393	-0.534123	-0.489246	-0.446056	-0.410446	-0.384397	-0.362748	-0.342648	-0.321807	-0.298577	-0.272133	-0.243234	-0.214559	-0.187549	-0.159899	-0.130604	-0.1015	-0.0735878	-0.0483754	-0.0300227
	Beaufort 5	Angle of heel (φ)																																					Critical angle of heel φc	Cumulative GZ area up to φc	Cumulative HA area up to φc	DSI
		0°	5°	10°	15°	20°	25°	30°	35°	40°	45°	50°	55°	60°	65°	70°	75°	80°	85°	90°	95°	100°	105°	110°	115°	120°	125°	130°	135°	140°	145°	150°	155°	160°	165°	170°	175°	180°
	Lightship	0	-0.0765672	0.965132	1.88397	2.68552	3.31618	3.59817	3.64233	3.5048	3.24916	2.91523	2.53075	2.1173	1.68303	1.23236	0.769344	0.300675	-0.168685	-0.645657	-1.13354	-1.62998	-2.14505	-2.67342	-3.18987	-3.67673	-4.11677	-4.4924	-4.7846	-4.97464	-5.04563	-4.99453	-4.82465	-4.50001	-3.96114	-3.09812	-1.86736	-0.531238	83.203	57.7039	23.4946	2.45605
	D-0,5	0	-0.0773672	0.962432	1.87987	2.68022	3.31028	3.59227	3.63583	3.4978	3.24186	2.90753	2.52295	2.1091	1.67453	1.22376	0.760744	0.292075	-0.176985	-0.653857	-1.14144	-1.63728	-2.15185	-2.67952	-3.19547	-3.68173	-4.12127	-4.4963	-4.788	-4.97744	-5.04783	-4.99603	-4.82545	-4.49961	-3.95964	-3.09582	-1.86536	-0.530838	83.1134	57.5726	23.4689	2.45314
	D-1	0	-0.0782672	0.959832	1.87587	2.67482	3.30448	3.58627	3.62923	3.4909	3.23446	2.90003	2.51505	2.101	1.66613	1.21506	0.752144	0.283675	-0.185385	-0.662057	-1.14924	-1.64468	-2.15845	-2.68562	-3.20107	-3.68683	-4.12567	-4.5003	-4.7913	-4.98024	-5.04993	-4.99763	-4.82605	-4.49931	-3.95824	-3.09352	-1.86326	-0.530338	83.0239	57.4417	23.4432	2.45025
	D-5	0	-0.0803672	0.912932	1.81747	2.63632	3.25678	3.53837	3.57713	3.4352	3.17596	2.83913	2.45255	2.0359	1.59843	1.14646	0.683544	0.215775	-0.251985	-0.727257	-1.21204	-1.70308	-2.21215	-2.73472	-3.24557	-3.72693	-4.16127	-4.5314	-4.8179	-5.00244	-5.06743	-5.00983	-4.83175	-4.49641	-3.94674	-3.07532	-1.84746	-0.526438	82.3065	56.3625	23.2372	2.42553
	D-10	0	-0.0872672	0.879132	1.76937	2.58522	3.19868	3.47907	3.51253	3.3665	3.10376	2.76453	2.37575	1.9562	1.51573	1.06236	0.599544	0.132575	-0.333285	-0.806757	-1.28854	-1.77478	-2.27785	-2.79432	-3.29957	-3.77543	-4.20437	-4.5687	-4.8497	-5.02884	-5.08833	-5.02423	-4.83795	-4.49201	-3.93234	-3.05252	-1.82806	-0.521738	81.4229	55.1023	22.9835	2.39747
	D-50	0	-0.142367	0.652632	1.43287	2.19302	2.75138	3.01777	3.01353	2.8379	2.55376	2.19953	1.79605	1.3595	0.903231	0.439055	-0.0235559	-0.481825	-0.933485	-1.38756	-1.84854	-2.30578	-2.76715	-3.23632	-3.69417	-4.12413	-4.50827	-4.8283	-5.0656	-5.20614	-5.22713	-5.11693	-4.86795	-4.44321	-3.81114	-2.87872	-1.69156	-0.491338	74.7454	45.9292	20.9437	2.19299
	D-100	0	-0.221667	0.465932	1.12657	1.74362	2.23758	2.47037	2.43043	2.2296	1.92766	1.55633	1.13835	0.693398	0.232631	-0.232345	-0.691956	-1.13972	-1.57079	-1.99876	-2.42914	-2.85278	-3.27795	-3.70132	-4.10407	-4.47643	-4.80417	-5.0703	-5.2593	-5.35884	-5.33823	-5.17883	-4.86415	-4.36471	-3.66164	-2.69002	-1.56486	-0.467338	67.5015	36.4504	18.5358	1.96648
	D-300	0	-0.390167	-0.0939675	0.140771	0.355224	0.491579	0.496469	0.350226	0.0743009	-0.283536	-0.685671	-1.10815	-1.5342	-1.95457	-2.36034	-2.74436	-3.10232	-3.43179	-3.74456	-4.04684	-4.33208	-4.61035	-4.88222	-5.12807	-5.33473	-5.49007	-5.5834	-5.6041	-5.53624	-5.36663	-5.08573	-4.65105	-4.01581	-3.18894	-2.26502	-1.33436	-0.418138	41.0382	10.7343	9.36874	1.14576
	D-500	0	-0.586367	-0.551168	-0.581829	-0.714876	-0.930921	-1.20753	-1.53657	-1.9113	-2.31594	-2.72877	-3.12985	-3.5099	-3.86127	-4.17804	-4.45666	-4.69322	-4.88889	-5.05836	-5.20874	-5.33628	-5.45305	-5.56022	-5.64227	-5.68883	-5.68847	-5.6324	-5.5115	-5.31814	-5.04553	-4.68083	-4.20415	-3.59581	-2.86364	-2.05612	-1.22286	-0.394838
	D-1000	0	-0.639467	-0.770868	-0.918629	-1.07248	-1.21592	-1.35153	-1.47437	-1.58	-1.66384	-1.72357	-1.75785	-1.7655	-1.74827	-1.70604	-1.63876	-1.54782	-1.43569	-1.31896	-1.20814	-1.10148	-1.01355	-0.949224	-0.895765	-0.84613	-0.794666	-0.737303	-0.672002	-0.600638	-0.52983	-0.463132	-0.394853	-0.322512	-0.250643	-0.181717	-0.119458	-0.0741376
	W-0,5	0	-0.0777672	0.961232	1.87807	2.67772	3.30768	3.58957	3.63283	3.4946	3.23856	2.90403	2.51945	2.1054	1.67073	1.21976	0.756844	0.288275	-0.180885	-0.657557	-1.14504	-1.64058	-2.15485	-2.68232	-3.19797	-3.68403	-4.12337	-4.4981	-4.7895	-4.97864	-5.04883	-4.99673	-4.82575	-4.49951	-3.95894	-3.09482	-1.86436	-0.530638	83.0722	57.5129	23.4571	2.45184
	W-1	0	-0.0790672	0.916432	1.82327	2.64382	3.26518	3.54707	3.58643	3.4453	3.18646	2.85013	2.46385	2.0476	1.61073	1.15886	0.695944	0.228075	-0.239885	-0.715457	-1.20054	-1.69248	-2.20235	-2.72562	-3.23747	-3.71953	-4.15467	-4.5256	-4.813	-4.99814	-5.06423	-5.00743	-4.83065	-4.49661	-3.94864	-3.07842	-1.85016	-0.527138	82.4369	56.5478	23.2746	2.42959
	W-5	0	-0.0826672	0.892932	1.79097	2.61372	3.23018	3.51137	3.54763	3.4039	3.14296	2.80503	2.41745	1.9994	1.56073	1.10796	0.645144	0.177775	-0.289185	-0.763657	-1.24704	-1.73588	-2.24215	-2.76212	-3.27047	-3.74913	-4.18097	-4.5486	-4.8325	-5.01454	-5.07713	-5.01653	-4.83465	-4.49451	-3.94024	-3.06482	-1.83866	-0.524338	81.9035	55.7759	23.1215	2.4123
	W-10	0	-0.0855672	0.806632	1.68457	2.54552	3.14468	3.42607	3.45433	3.3047	3.03906	2.69773	2.30715	1.885	1.44203	0.987455	0.524644	0.0586754	-0.405685	-0.877257	-1.35664	-1.83858	-2.33645	-2.84742	-3.34757	-3.81823	-4.24207	-4.6014	-4.8774	-5.05174	-5.10643	-5.03663	-4.84275	-4.48751	-3.91904	-3.03192	-1.81076	-0.517538	80.6318	53.9277	22.7563	2.36979
	W-50	0	-0.175067	0.567732	1.28887	1.98412	2.51498	2.76867	2.74723	2.559	2.26666	1.90523	1.49475	1.0534	0.593931	0.128055	-0.334356	-0.787225	-1.22959	-1.67276	-2.11944	-2.56248	-3.00715	-3.45282	-3.88447	-4.28813	-4.64697	-4.9425	-5.1571	-5.27894	-5.28103	-5.14813	-4.86815	-4.40651	-3.74014	-2.78692	-1.62776	-0.479038	71.3846	41.4471	19.8422	2.08884
	W-100	0	-0.269667	0.330932	0.879971	1.38662	1.81288	2.00457	1.94483	1.729	1.41236	1.02923	0.60565	0.160398	-0.295369	-0.751745	-1.19966	-1.63222	-2.04589	-2.45066	-2.85074	-3.24118	-3.63185	-4.02042	-4.38657	-4.71443	-4.99447	-5.2172	-5.3682	-5.43154	-5.37573	-5.18013	-4.82065	-4.27801	-3.52724	-2.54332	-1.47816	-0.450738	61.7596	29.4721	16.5493	1.78087
	W-300	0	-0.514567	-0.399568	-0.323429	-0.328376	-0.420221	-0.596231	-0.850674	-1.1726	-1.54004	-1.93147	-2.32905	-2.719	-3.09157	-3.43744	-3.75056	-4.02832	-4.26959	-4.48796	-4.69034	-4.87258	-5.04565	-5.21072	-5.35157	-5.45683	-5.51557	-5.5169	-5.451	-5.30804	-5.07583	-4.74233	-4.28495	-3.67301	-2.91624	-2.08752	-1.24276	-0.398638
	W-500	0	-0.639467	-0.770868	-0.918629	-1.07248	-1.21592	-1.35153	-1.47437	-1.58	-1.66384	-1.72357	-1.75785	-1.7655	-1.74827	-1.70604	-1.63876	-1.54782	-1.43569	-1.31896	-1.20814	-1.10148	-1.01355	-0.949224	-0.895765	-0.84613	-0.794666	-0.737303	-0.672002	-0.600638	-0.52983	-0.463132	-0.394853	-0.322512	-0.250643	-0.181717	-0.119458	-0.0741376
	W-1000	0	-0.639467	-0.770868	-0.918629	-1.07248	-1.21592	-1.35153	-1.47437	-1.58	-1.66384	-1.72357	-1.75785	-1.7655	-1.74827	-1.70604	-1.63876	-1.54782	-1.43569	-1.31896	-1.20814	-1.10148	-1.01355	-0.949224	-0.895765	-0.84613	-0.794666	-0.737303	-0.672002	-0.600638	-0.52983	-0.463132	-0.394853	-0.322512	-0.250643	-0.181717	-0.119458	-0.0741376
	Beaufort 7	Angle of heel (φ)																																					Critical angle of heel φc	Cumulative GZ area up to φc	Cumulative HA area up to φc	DSI
		0°	5°	10°	15°	20°	25°	30°	35°	40°	45°	50°	55°	60°	65°	70°	75°	80°	85°	90°	95°	100°	105°	110°	115°	120°	125°	130°	135°	140°	145°	150°	155°	160°	165°	170°	175°	180°
	Lightship	0	-0.734238	0.172321	0.939191	1.58252	2.06565	2.20816	2.12598	1.87982	1.53796	1.14259	0.722859	0.301538	-0.115006	-0.522254	-0.916062	-1.29121	-1.64524	-2.00216	-2.37607	-2.76283	-3.18745	-3.64967	-4.11113	-4.54695	-4.93405	-5.25069	-5.47573	-5.59237	-5.59054	-5.47085	-5.23075	-4.83171	-4.21892	-3.28501	-1.99022	-0.607486	63.6195	48.7499	34.8888	1.39729
	D-0,5	0	-0.735038	0.169621	0.935091	1.57722	2.05975	2.20226	2.11948	1.87282	1.53066	1.13489	0.715059	0.293338	-0.123506	-0.530854	-0.924662	-1.29981	-1.65354	-2.01036	-2.38397	-2.77013	-3.19425	-3.65577	-4.11673	-4.55195	-4.93855	-5.25459	-5.47913	-5.59517	-5.59274	-5.47235	-5.23155	-4.83131	-4.21742	-3.28271	-1.98822	-0.607086	63.5186	48.6055	34.8172	1.39602
	D-1	0	-0.735938	0.167021	0.931091	1.57182	2.05395	2.19626	2.11288	1.86592	1.52326	1.12739	0.707159	0.285238	-0.131906	-0.539554	-0.933262	-1.30821	-1.66194	-2.01856	-2.39177	-2.77753	-3.20085	-3.66187	-4.12233	-4.55705	-4.94295	-5.25859	-5.48243	-5.59797	-5.59484	-5.47395	-5.23215	-4.83101	-4.21602	-3.28041	-1.98612	-0.606586	63.4189	48.4624	34.7466	1.39474
	D-5	0	-0.738038	0.120121	0.872691	1.53332	2.00625	2.14836	2.06078	1.81022	1.46476	1.06649	0.644659	0.220138	-0.199606	-0.608154	-1.00186	-1.37611	-1.72854	-2.08376	-2.45457	-2.83593	-3.25455	-3.71097	-4.16683	-4.59715	-4.97855	-5.28969	-5.50903	-5.62017	-5.61234	-5.48615	-5.23785	-4.82811	-4.20452	-3.26221	-1.97032	-0.602686	62.6223	47.2866	34.1815	1.3834
	D-10	0	-0.744938	0.0863211	0.824591	1.48222	1.94815	2.08906	1.99618	1.74152	1.39256	0.991893	0.567859	0.140438	-0.282306	-0.692254	-1.08586	-1.45931	-1.80984	-2.16326	-2.53107	-2.90763	-3.32025	-3.77057	-4.22083	-4.64565	-5.02165	-5.32699	-5.54083	-5.64657	-5.63324	-5.50055	-5.24405	-4.82371	-4.19012	-3.23941	-1.95092	-0.597986	61.661	45.9218	33.4997	1.37081
	D-50	0	-0.800038	-0.140179	0.488091	1.09002	1.50085	1.62776	1.49718	1.21292	0.842563	0.426893	-0.0118406	-0.456262	-0.894806	-1.31555	-1.70896	-2.07371	-2.41004	-2.74406	-3.09107	-3.43863	-3.80955	-4.21257	-4.61543	-4.99435	-5.32555	-5.58659	-5.75673	-5.82387	-5.77204	-5.59325	-5.27405	-4.77491	-4.06892	-3.06561	-1.81442	-0.567586	54.8651	36.3787	28.6441	1.27002
	D-100	0	-0.879338	-0.326879	0.181791	0.640619	0.987045	1.08036	0.914082	0.604625	0.216463	-0.216307	-0.669541	-1.12236	-1.56541	-1.98695	-2.37736	-2.73161	-3.04734	-3.35526	-3.67167	-3.98563	-4.32035	-4.67757	-5.02533	-5.34665	-5.62145	-5.82859	-5.95043	-5.97657	-5.88314	-5.65515	-5.27025	-4.69641	-3.91942	-2.87691	-1.68772	-0.543586	47.5009	26.7377	23.4272	1.14131
	D-300	0	-1.04784	-0.886779	-0.804009	-0.747781	-0.758955	-0.893536	-1.16612	-1.55068	-1.99474	-2.45831	-2.91604	-3.34996	-3.75261	-4.11495	-4.42976	-4.69421	-4.90834	-5.10106	-5.28937	-5.46493	-5.65275	-5.85847	-6.04933	-6.20495	-6.30735	-6.34169	-6.29523	-6.15397	-5.91154	-5.56205	-5.05715	-4.34751	-3.44672	-2.45191	-1.45722	-0.494386
	D-500	0	-1.24404	-1.34398	-1.52661	-1.81788	-2.18145	-2.59754	-3.05292	-3.53628	-4.02714	-4.50141	-4.93774	-5.32566	-5.65931	-5.93265	-6.14206	-6.28511	-6.36544	-6.41486	-6.45127	-6.46913	-6.49545	-6.53647	-6.56353	-6.55905	-6.50575	-6.39069	-6.20263	-5.93587	-5.59044	-5.15715	-4.61025	-3.92751	-3.12142	-2.24301	-1.34572	-0.471086
	D-1000	0	-1.29714	-1.56368	-1.86341	-2.17548	-2.46645	-2.74154	-2.99072	-3.20498	-3.37504	-3.49621	-3.56574	-3.58126	-3.54631	-3.46065	-3.32416	-3.13971	-2.91224	-2.67546	-2.45067	-2.23433	-2.05595	-1.92547	-1.81703	-1.71635	-1.61195	-1.49559	-1.36313	-1.21837	-1.07474	-0.939447	-0.800946	-0.654205	-0.50842	-0.368606	-0.242316	-0.150386
	W-0,5	0	-0.735438	0.168421	0.933291	1.57472	2.05715	2.19956	2.11648	1.86962	1.52736	1.13139	0.711559	0.289638	-0.127306	-0.534854	-0.928562	-1.30361	-1.65744	-2.01406	-2.38757	-2.77343	-3.19725	-3.65857	-4.11923	-4.55425	-4.94065	-5.25639	-5.48063	-5.59637	-5.59374	-5.47305	-5.23185	-4.83121	-4.21672	-3.28171	-1.98722	-0.606886	63.4733	48.5405	34.7851	1.39544
	W-1	0	-0.736738	0.123621	0.878491	1.54082	2.01465	2.15706	2.07008	1.82032	1.47526	1.07749	0.655959	0.231838	-0.187306	-0.595754	-0.989462	-1.36381	-1.71644	-2.07196	-2.44307	-2.82533	-3.24475	-3.70187	-4.15873	-4.58975	-4.97195	-5.28389	-5.50413	-5.61587	-5.60914	-5.48375	-5.23675	-4.82831	-4.20642	-3.26531	-1.97302	-0.603386	62.7656	47.4884	34.2832	1.38518
	W-5	0	-0.740338	0.100121	0.846191	1.51072	1.97965	2.12136	2.03128	1.77892	1.43176	1.03239	0.609559	0.183638	-0.237306	-0.646654	-1.04026	-1.41411	-1.76574	-2.12016	-2.48957	-2.86873	-3.28455	-3.73837	-4.19173	-4.61935	-4.99825	-5.30689	-5.52363	-5.63227	-5.62204	-5.49285	-5.24075	-4.82621	-4.19802	-3.25171	-1.96152	-0.600586	62.1813	46.6505	33.8687	1.37739
	W-10	0	-0.743238	0.0138211	0.739791	1.44252	1.89415	2.03606	1.93798	1.67972	1.32786	0.925093	0.499259	0.0692383	-0.356006	-0.767154	-1.16076	-1.53321	-1.88224	-2.23376	-2.59917	-2.97143	-3.37885	-3.82367	-4.26883	-4.68845	-5.05935	-5.35969	-5.56853	-5.66947	-5.65134	-5.51295	-5.24885	-4.81921	-4.17682	-3.21881	-1.93362	-0.593786	60.8141	44.6633	32.899	1.35759
	W-50	0	-0.832738	-0.225079	0.344091	0.881119	1.26445	1.37866	1.23088	0.934025	0.555463	0.132593	-0.313141	-0.762362	-1.20411	-1.62655	-2.01976	-2.37911	-2.70614	-3.02926	-3.36197	-3.69533	-4.04955	-4.42907	-4.80573	-5.15835	-5.46425	-5.70079	-5.84823	-5.89667	-5.82594	-5.62445	-5.27425	-4.73821	-3.99792	-2.97381	-1.75062	-0.555286	51.4874	31.8057	26.2353	1.21232
	W-100	0	-0.927338	-0.461879	-0.0648088	0.283619	0.562345	0.614564	0.428482	0.104025	-0.298837	-0.743407	-1.20224	-1.65536	-2.09341	-2.50635	-2.88506	-3.22411	-3.52244	-3.80716	-4.09327	-4.37403	-4.67425	-4.99667	-5.30783	-5.58465	-5.81175	-5.97549	-6.05933	-6.04927	-5.92064	-5.65645	-5.22675	-4.60971	-3.78502	-2.73021	-1.60102	-0.526986	41.2911	19.6367	19.1749	1.02409
	W-300	0	-1.17224	-1.19238	-1.26821	-1.43138	-1.67075	-1.98624	-2.36702	-2.79758	-3.25124	-3.70411	-4.13694	-4.53476	-4.88961	-5.19205	-5.43596	-5.62021	-5.74614	-5.84446	-5.93287	-6.00543	-6.08805	-6.18697	-6.27283	-6.32705	-6.33285	-6.27519	-6.14213	-5.92577	-5.62074	-5.21865	-4.69105	-4.00471	-3.17402	-2.27441	-1.36562	-0.474886
	W-500	0	-1.29714	-1.56368	-1.86341	-2.17548	-2.46645	-2.74154	-2.99072	-3.20498	-3.37504	-3.49621	-3.56574	-3.58126	-3.54631	-3.46065	-3.32416	-3.13971	-2.91224	-2.67546	-2.45067	-2.23433	-2.05595	-1.92547	-1.81703	-1.71635	-1.61195	-1.49559	-1.36313	-1.21837	-1.07474	-0.939447	-0.800946	-0.654205	-0.50842	-0.368606	-0.242316	-0.150386
	W-1000	0	-1.29714	-1.56368	-1.86341	-2.17548	-2.46645	-2.74154	-2.99072	-3.20498	-3.37504	-3.49621	-3.56574	-3.58126	-3.54631	-3.46065	-3.32416	-3.13971	-2.91224	-2.67546	-2.45067	-2.23433	-2.05595	-1.92547	-1.81703	-1.71635	-1.61195	-1.49559	-1.36313	-1.21837	-1.07474	-0.939447	-0.800946	-0.654205	-0.50842	-0.368606	-0.242316	-0.150386
